# Supplementary material for: Household cooking fuel type and childhood anaemia in sub-Saharan Africa: analysis of cross-sectional surveys of 123, 186 children from 29 countries
Source: PubMed Central journal article supplement — BMJ Open. 2021 Jul 20;11(7):e048724. doi: 10.1136/bmjopen-2021-048724 (PMC8292815; doi:10.1136/bmjopen-2021-048724), 2021-07-20
Supplement: bmjopen-2021-048724.draft_revisions.pdf [file bmjopen-2021-048724.draft_revisions.pdf]

# BMJ Open

BMJ Open is committed to open peer review. As part of this commitment we make the peer review history of every article we publish publicly available.

When an article is published we post the peer reviewers' comments and the authors' responses online. We also post the versions of the paper that were used during peer review. These are the versions that the peer review comments apply to.

The versions of the paper that follow are the versions that were submitted during the peer review process. They are not the versions of record or the final published versions. They should not be cited or distributed as the published version of this manuscript.

BMJ Open is an open access journal and the full, final, typeset and author-corrected version of record of the manuscript is available on our site with no access controls, subscription charges or pay-per-view fees (<http://bmjopen.bmj.com>).

If you have any questions on BMJ Open's open peer review process please email [info.bmjopen@bmj.com](mailto:info.bmjopen@bmj.com)

# BMJ Open

## Household cooking fuel type and child anaemia in Sub-Saharan Africa: analysis of cross-sectional surveys of 95,056 children from 29 countries

|                               |                                                                                                                                                                                                                                                                                                                                                                                                                                                                                                                             |
|-------------------------------|-----------------------------------------------------------------------------------------------------------------------------------------------------------------------------------------------------------------------------------------------------------------------------------------------------------------------------------------------------------------------------------------------------------------------------------------------------------------------------------------------------------------------------|
| Journal:                      | <i>BMJ Open</i>                                                                                                                                                                                                                                                                                                                                                                                                                                                                                                             |
| Manuscript ID                 | bmjopen-2021-048724                                                                                                                                                                                                                                                                                                                                                                                                                                                                                                         |
| Article Type:                 | Original research                                                                                                                                                                                                                                                                                                                                                                                                                                                                                                           |
| Date Submitted by the Author: | 06-Jan-2021                                                                                                                                                                                                                                                                                                                                                                                                                                                                                                                 |
| Complete List of Authors:     | Amadu, Iddrisu; University of Cape Coast, Department of Fisheries and Aquatic Sciences; University of Cape Coast, Department of Fisheries and Aquatic Sciences<br>Seidu, Abdul-Aziz; University of Cape Coast, Department of Population and Health; James Cook University, Department of Population and Health<br>Afitiri, Abdul-Rahaman; University of Cape Coast, Department of Environmental Science<br>Ahinkorah, Bright; University of Technology Sydney<br>Yaya, Sanni; University of Ottawa; Imperial College London |
| Keywords:                     | Anaemia < HAEMATOLOGY, PUBLIC HEALTH, Community child health < PAEDIATRICS                                                                                                                                                                                                                                                                                                                                                                                                                                                  |
|                               |                                                                                                                                                                                                                                                                                                                                                                                                                                                                                                                             |

SCHOLARONE™  
Manuscripts

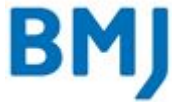

I, the Submitting Author has the right to grant and does grant on behalf of all authors of the Work (as defined in the below author licence), an exclusive licence and/or a non-exclusive licence for contributions from authors who are: i) UK Crown employees; ii) where BMJ has agreed a CC-BY licence shall apply, and/or iii) in accordance with the terms applicable for US Federal Government officers or employees acting as part of their official duties; on a worldwide, perpetual, irrevocable, royalty-free basis to BMJ Publishing Group Ltd ("BMJ") its licensees and where the relevant Journal is co-owned by BMJ to the co-owners of the Journal, to publish the Work in this journal and any other BMJ products and to exploit all rights, as set out in our [licence](#).

The Submitting Author accepts and understands that any supply made under these terms is made by BMJ to the Submitting Author unless you are acting as an employee on behalf of your employer or a postgraduate student of an affiliated institution which is paying any applicable article publishing charge ("APC") for Open Access articles. Where the Submitting Author wishes to make the Work available on an Open Access basis (and intends to pay the relevant APC), the terms of reuse of such Open Access shall be governed by a Creative Commons licence – details of these licences and which [Creative Commons](#) licence will apply to this Work are set out in our licence referred to above.

Other than as permitted in any relevant BMJ Author's Self Archiving Policies, I confirm this Work has not been accepted for publication elsewhere, is not being considered for publication elsewhere and does not duplicate material already published. I confirm all authors consent to publication of this Work and authorise the granting of this licence.

## Household cooking fuel type and child anaemia in Sub-Saharan Africa: analysis of cross-sectional surveys of 95,056 children from 29 countries

Iddrisu Amadu<sup>1,2,3</sup>, Abdul-Aziz Seidu<sup>4,5\*</sup>, Abdul-Rahaman Afitiri<sup>3</sup>, Bright Opoku Ahinkorah<sup>6</sup>, Sanni Yaya<sup>7,8</sup>

1. Africa Centre of Excellence in Coastal Resilience, University of Cape Coast, Cape Coast, Ghana
2. Department of Fisheries and Aquatic Sciences, School of Biological Sciences, College of Agriculture and Natural Sciences, University of Cape Coast, Ghana
3. Department of Environmental Science, School of Biological Sciences, College of Agriculture and Natural Sciences, University of Cape Coast, Ghana
4. Department of Population and Health, University of Cape Coast, Cape Coast, Ghana
5. College of Public Health, Medical and Veterinary Sciences, James Cook University, Townsville, Queensland, Australia
6. The Australian Centre for Public and Population Health Research (ACPPHR), Faculty of Health, University of Technology Sydney, Australia
7. School of International Development and Global Studies, University of Ottawa, Ottawa, Canada
8. The George Institute for Global Health, Imperial College London, London United Kingdom

**†Correspondence to:** Mr Abdul-Aziz Seidu, Department of Population and Health, Faculty of Social Sciences, College of Humanities and Legal Studies, University of Cape Coast, Cape Coast, Ghana, PMB ; E-mail:[abdul-aziz.seidu@stu.ucc.edu.gh](mailto:abdul-aziz.seidu@stu.ucc.edu.gh); Tel.: +233244291198

IA: [iddrisu.amadu@stu.ucc.edu.gh](mailto:iddrisu.amadu@stu.ucc.edu.gh)

†AS: [abdul-aziz.seidu@stu.ucc.edu.gh](mailto:abdul-aziz.seidu@stu.ucc.edu.gh)

ARA: [abdul-rahaman.afitiri@stu.ucc.edu.gh](mailto:abdul-rahaman.afitiri@stu.ucc.edu.gh)

BOA: [brightahinkorah@gmail.com](mailto:brightahinkorah@gmail.com)

SY: [hsanniya@uottawa.ca](mailto:hsanniya@uottawa.ca)

## Abstract

### Objective:

This study sought to investigate the association between household cooking fuel type, and the joint impact of household cooking fuel type and urbanicity on anaemia among children under the age of 5 in sub-Saharan Africa.

**Design:** We analysed cross-sectional data of 95,056 children under the age of 5 from 29 sub-Saharan African countries. Bivariate and multivariate analyses were performed using a chi-square test of independence and negative log-log regression respectively at  $p < 0.05$ .

### Outcome measures: Anaemia

**Results:** The percentage of children who had anaemia was 43%. Children from rural households that depend on unclean cooking fuels were more likely to be anaemic [AOR=1.028; 95% CI=1.011-1.046] compared to children from urban households using unclean cooking fuel. We also found that children in female-headed households [AOR=1.023; CI=1.007-1.039], children in large households [AOR=1.030; CI=1.008-1.052]; those in households with an improved source of drinking water [AOR=1.025; CI=1.009-1.041] had higher odds of suffering from anaemia. However, children with normal birth weight [AOR=0.969; CI=0.953-0.986], children aged 4 [AOR=0.935; CI=0.916-0.955], children whose mothers are aged 45-49 [AOR=0.913; CI=0.863-0.963] and those aged 30-34 [AOR=0.917; CI=0.887-0.948], children whose mothers had tertiary level of education [AOR=0.911; CI=0.872-0.953], children in rich households [AOR=0.963; CI=0.944-0.982] and those in households with improved type of toilet facility [AOR=0.975; CI=0.961-0.990] had lower odds of being anaemic.

**Conclusions:** Our study established an association between the joint effect of type of household cooking fuel and urbanicity and anaemia among children under the age of 5 in SSA. Childs' birth weight, current age, maternal age, sex of household head, age of household head, maternal education, wealth status, size of household, type of source of drinking water and country of residence are associated with childhood anaemia. It is therefore critical to promote the usage of clean cooking fuels among households and women in rural areas.

**Keywords:** Anaemia; Under-five Children; Sub-Saharan Africa; DHS; Public Health

### Strengths and limitations

- The major strength of this study is the use of recent nationally representative surveys, with relatively large sample sizes. This makes the findings generalisable to all under-five children in the countries we included in our study.
- Also, we employed rigorous statistical modelling to assess the association between the type of cooking fuel and anaemia while controlling for theoretical and practical confounders.
- The study, however, is limited by the cross-sectional nature of the design employed for the data collection. Due to this, it is impossible to detect temporality of sequence. Also, geographic region and Urbanicity Wealth were associated with child anaemia ( $p < 0.05$ ) but could not be included in the model due to multicollinearity.

view only

## INTRODUCTION

In low and middle-income countries, anaemia remains a major public health problem which causes childhood mortality and morbidity [1]. Anaemia is a condition in which the haemoglobin level is lower than the body's required amount for physiological activities [2]. According to [3] about 273.2 million children suffer from anaemia globally with a general prevalence of 42.6%. However, its effects are disproportionate across regions, with sub-Saharan Africa (SSA) being one of the most affected with a startling prevalence rate of 62.3% [4].

Anaemia is a major contributor to some of the serious adverse health conditions in children and affects their cognitive, behavioural and physical development [3, 5–7]. The notable causes of anaemia in children are multifactorial and include deficiency of iron, and other micronutrients such as folate, vitamin B12 and vitamin A; malaria, HIV and chronic disease such as sickle cell disease [8].

Apart from these causes, a major environmental cause of anaemia is indoor air pollution as a result of biomass fuel use in cooking in households [9]. Household biomass fuel is a global air pollution issue that harms human health, the climate and the environment. About three billion people use biomass fuels such as plant residues, animal dung, wood and charcoal for daily domestic use [10]. Inefficient combustion of these fuels could release harmful gases such as sulphur dioxide (SO<sub>2</sub>), carbon monoxide (CO) and nitrogen dioxide (NO<sub>2</sub>), and Particulate Matter (PM) [11, 12]. According to [13], households that use biomass fuels are often exposed to peak indoor particulate matter (PM<sub>10</sub>) levels greater than the air quality guidelines. The mechanism by which biomass fuels use could contribute to childhood anaemia are unknown. However, studies have shown that biomass fuel expels high carbon monoxide levels which bind with haemoglobin, form carboxyhaemoglobin and reduce the level of haemoglobin in the blood, which leads to anaemia. For instance, studies in India [9] and Swaziland [11] found the prevalence of anaemia to be significantly high among children in households that rely on biomass fuels for cooking.

Apart from anaemia, evidence of other adverse health outcomes spanning respiratory illnesses, cancer and eye problems from indoor air pollution due to inefficient burning of biomass fuels for cooking in poorly ventilated settings exist [14–16]. A majority of the burden is suffered by women who by custom are responsible for cooking and other household chores, and their children, especially, those below the age of 5 [16, 17]. The prevalence of the burden is relatively low in urban areas where clean fuels like liquid petroleum gas or natural gas and electricity are typically used. However, most rural residents mainly depend on biomass fuels [19]. These fuels include among others wood, animal dung, twigs and dry leaves, and crop residues such as straw and rice husks [20]. The high burden of adverse health outcomes among rural residents is that most of them often depends on unclean cooking fuels [15, 21, 22].

The associations between household biomass fuel use in cooking and important health variables of women and children such as adverse pregnancy outcomes (low birth weight, stillbirth) [14, 23] women health (BMI, anaemia) [14, 24] and the health of children under 5 years of age (child weight, child anaemia) [16, 23] have been explored. Few studies have explored the association

1  
2  
3 between household biomass fuel use, a notable source of indoor air pollution in LMICs with child  
4 anaemia in SSA. Further, critical to our understanding but absent in such sub-regional analysis by  
5 studies is the joint impact of household biomass fuel use and urbanicity on child anaemia in SSA.  
6 This study, therefore, seeks to investigate the joint effect of household biomass fuel use for  
7 cooking and urbanicity on anaemia among children under the age of 5 in SSA.  
8  
9

## 10 METHODS

### 11 Data and sampling

12 Nationally representative data from the Demographic and Health Surveys (DHS) Program for SSA  
13 countries from 2010 to 2018 were acquired for analysis in this study. The DHS program provides  
14 large secondary data gathered from surveys using probability sampling methods, following  
15 standard protocols that are internationally accepted. Different sets of questionnaires designed  
16 and pre-tested to ensure reliability and amenability for comparison of data gathered on various  
17 spatial and temporal scales are used in the survey. Some questionnaires the program uses include  
18 the "Children's questionnaire" "Mother's questionnaire", "Men's questionnaire" and "Household  
19 questionnaire". These questionnaires cover a broad range of variables cutting across  
20 demographics and anthropometrics, water and sanitation, health, wealth, nutrition among  
21 others. The program recruits and trains field officers to collect accurate data and measurement  
22 of weight, height, anaemia using recommended guidelines and instruments. Data on other  
23 important variables such as household cooking fuel, urbanicity, wealth, water and sanitation are  
24 taken at the household level. The dataset used in this study are: Children's Data - Children's  
25 Recode, and Household Data - Household Recode (variable names: caseid; v000; v001 v007; v013;  
26 v102; v113; v116; v136; v149; v151; v152; v190; bord; b4; b8; m19; hw2; v457; v005; hhid; hv001,  
27 hv000; hv226).  
28  
29  
30  
31  
32  
33  
34

### 35 Study Countries

36 A sample of 95,056 was drawn from 29 countries (Figure 1) in SSA. For a country to be selected,  
37 it must meet the following criteria: should be found in SSA based on the United Nations regional  
38 groupings; it must have a DHS dataset with standardized questions and observations on anaemia  
39 level of children under five years as well as household cooking fuel type, urbanicity, source of  
40 drinking water and type of toilet facility. Where multiple datasets exist for a country, the most  
41 recent dataset is used. Detailed information on countries, together with years of survey are  
42 shown in Table 1.  
43  
44  
45  
46  
47

48 \*\*\*Figure 1\*\*\*

49 \*\*\*Table 1\*\*\*  
50  
51  
52  
53  
54  
55  
56  
57  
58  
59  
60



### Definition of important variables

The dataset provided information on household cooking fuel type, source of drinking water and toilet facility type at the household level. The observations for household cooking fuel were classified into "Clean" and "Unclean" (polluting fuels) following the criterion some studies [25, 26] used (see Table 2). The weight of the child at birth named as "Birth weight" was categorized as "Underweight" (<2.5kg) and "Normal" ( $\geq 2.5$ kg) (see, [27]). Also, the observations for the household source of drinking water and type of toilet facility were classified into "improved" and "unimproved" using the revised definitions by the WHO/UNICEF Joint Monitoring Programme (JMP) report [28]. Table 2 summarises the descriptions of improved and unimproved sources of water and toilet facilities (see [29]) for explication of the categorisation of these critical basic services.

\*\*\*Table 2\*\*\*

### Measures

#### Outcome variable

Anaemia status of children is the outcome variable considered in this study. According to DHS, the anaemia status of living children within the age bracket 0-4 years before the survey night was taken. It has its responses classified into four (4) categories according to the WHO recommendation as (i) "Not anaemic" for children with haemoglobin count(g/dl) measuring above 11g/dl; (ii) "Mild anaemia" for haemoglobin count of 10-10.9g/dl; (iii) "Moderate anaemia" for haemoglobin count between 7.0-9.9g/dl; and (iv) "Severe anaemia" for haemoglobin count less than 7.0g/dl. Children with no observations for anaemia count (not tested) and those whose mothers were not listed in the household questionnaire were excluded. Observations under mild, moderate and severe were combined and recoded as "Anaemic (Yes)" and observations under not anaemic was recoded as "Not anaemic (No)". The Anaemia status of children was represented as a dichotomous variable with "0" representing "No" and 1 representing "Yes".

#### Main predictor variable

The predictor chosen for this study is a composite variable formed from the interactive effect of household cooking fuel type and urbanicity. The selection of the predictor variable was based on parsimony, literature review, theoretical relevance as well as practical significance. Household cooking fuel type and Urbanicity both had two categories since the former was classified into "Clean" and "Unclean" and the latter measured as "Rural" and "Urban" per the Demographic Health Survey (DHS). This, therefore, gave a four mutually exclusive groups: Unclean urban (households relying on "unclean" cooking fuel and found in urban areas); Unclean rural (households relying on "unclean" cooking fuel and found in rural areas); Clean urban (households using "clean" cooking fuels and found in urban areas); and clean rural (households using "clean"

1  
2  
3 cooking fuels and found in rural areas). The rationale for the four-responses was based on  
4 previous studies [30,31]. Out of the four responses, “Unclean Urban” was chosen as the reference  
5 category in the models. The choice of the reference category was based guided by previous  
6 studies [32,33]. These authors explained that urban areas are considered as places with relatively  
7 higher levels of air pollution and its associated negative health outcomes, which has the potential  
8 of multiplied burden relative to child anaemia when households use unclean cooking fuels. This  
9 makes it prudent to use “Unclean Urban” as the reference category.  
10  
11  
12

### 13 **Compositional and contextual variables**

14 Variables which relate to an individual's socio-demographic characteristics (biosocial and socio-  
15 cultural factors) together constitute compositional factors [34, 35]. Biosocial factors refer to  
16 underlying biological and physical attributes present in an individual at birth and are not  
17 amenable to change. Socio-cultural factors, on the other hand, refers to customs, beliefs,  
18 lifestyles and values [29].  
19  
20

21 Biosocial variables considered in this study included: sex of child (male, female); current age of  
22 the child in years with categories 0, 1, 2, 3, and 4; the age of mother (15-19, 20-24, 25-29, 30-34,  
23 35-39,40-44, 45-49); sex of household head (male, female); the age of household head (“young  
24 adult” for those below 35years, middle-age adult for 35-55 years, and “old-age adult” for those  
25 above 55 years).  
26  
27  
28

29 The study considered socio-cultural factors including educational attainment of the mother (no  
30 education, primary, secondary, tertiary); birth order number (1, 2, 3, 4, 5 and above); household  
31 size (small: 1-5, medium: 6-10, large: above 10). Also, the DHS collects data on the wealth index  
32 of all interviewed households and place them into five wealth quintiles (poorer, poor, middle,  
33 rich, richer). Observations of wealth index under poorer and poor were combined and recoded  
34 as “poor”. Similarly, observations under “rich” and “richer” were combined and recoded as  
35 “rich”. Finally, household source of drinking water and type toilet facility which were both  
36 categorized into “improved” and “unimproved”.  
37  
38  
39

40 According to studies [34, 36], contextual factors refer to those factors related to respondent's  
41 neighbourhood attributes or opportunities and services that are space-bound [29, 35, 36].  
42 Contextual factors considered in this study include country and geographic region (Western  
43 Africa, Eastern Africa, Southern Africa, and Central Africa).  
44  
45

### 46 **Data Analysis**

47 The STATA version 14.0 MP software was used for the analysis of data. To understand the  
48 distribution of childhood anaemia and influence of predictive factors on anaemia, descriptive  
49 analysis was performed. Using ArcGIS 10.6, the data was integrated with ESRI Shapefiles to  
50 construct a map of the study countries showing the distribution of child anaemia. We then  
51 determined the associations between the anaemia status of children under five and the relevant  
52 predictors using inferential statistics. These relationships were further examined using  
53 multivariate techniques while controlling for theoretically relevant compositional and contextual  
54  
55  
56  
57  
58  
59  
60

1  
2  
3 factors. Statistical significance of 0.05 and 95% confidence interval (CI) was used in analysis and  
4 results presented as contingency tables.  
5

### 6 Univariate analysis

7  
8 Pearson chi-square test of independence and Cramer's V statistic were applied in the univariate  
9 analysis of predictors of child under five anaemia. The strength of associations between anaemia  
10 status and the predictors was tested using Cramer's V statistics.  
11

### 12 Multivariate regression

13  
14 The outcome variable (anaemia status of children under age 5) had 57% of responses in the non-  
15 affirmative and 43% were affirmative. The relationship between anaemia status and the  
16 interactive effect of household cooking fuel and urbanicity was analysed using a negative log-log  
17 regression model. A negative log-log regression model is apt when the responses to a  
18 dichotomous response variable are asymmetric in the [0, 1] interval for which the non-affirmative  
19 is more than 55% as in the case of the response variable in this study [37–39]. The likelihood of  
20 a child been anaemic was estimated and reported as exponential coefficients - odds ratios (OR).  
21 An OR of 1 means that the predictor does not affect the odds of a child been anaemic; OR >1  
22 means that the predictor is associated with higher odds of been anaemic; and OR <1 means that  
23 the predictor is associated with lower odds of been anaemic. Clustering of observations in units  
24 of households was controlled by imposing on the models a "cluster" variable, thus, the  
25 identification numbers of the respondents at the cluster level. Missing responses for the outcome  
26 and main predictor variables were dropped. This adjusted the SE leading to statistically robust  
27 estimation of parameters.  
28  
29  
30  
31  
32

33 At the multivariate level, we first performed multicollinearity diagnosis (see Supplementary file  
34 1) of the variables considered by fitting the regression models. Four (4) models were run: the  
35 joint effect of household cooking fuel type and urbanicity (Model 1); birth weight and biosocial  
36 factors (Model 2), sociocultural (Model 3), and the contextual (Model 4). Literature and  
37 parsimony informed the chosen groups of references for the predictor variables in the models.  
38 Respondents from urban settings who rely on unclean cooking fuel types "Unclean urban" was  
39 chosen for the key predictor. This is selected considering the fact that urban residents are  
40 commonly exposed to relatively high levels of air pollutants and households using unclean  
41 cooking fuels could potentially suffer multiplied effects including the risk of high child under age  
42 five years anaemia prevalence. The selected reference group for sex of child and sex of household  
43 head was "male". Studies show that males in households are often less worried about children  
44 under five years as well as water and sanitation issues [29, 40]. The selected reference group for  
45 the current age of the child was "0". Young adults and no education were respectively selected  
46 as reference groups for the age of household head and educational attainment of the mother.  
47 Unimproved was selected as the reference group for the source of drinking water and type of  
48 toilet facility. The young adult group was selected as the reference group because this is a  
49 demographic group in transition and may be unable to provide better services for the family  
50 while those with no education has a direct effect on the ability to afford and capacity to  
51  
52  
53  
54  
55  
56  
57  
58  
59  
60

1  
2  
3 spearhead decision-making of households for better services and conditions. Small household  
4 size was selected as the reference group for household size.  
5

### 6 **Ethical considerations**

7  
8 We used datasets provided by the Demographic Health Surveys Program and have not had any  
9 form of contact with the study participants. The program obtains approval from the Ethics Boards  
10 of the various partner organisations and countries such as the Ministries of Health. The DHS  
11 Program recognizes and adheres to established international and local ethical standards and  
12 protocols in its surveys. The ICF International's Institutional Review Board (IRB) through The DHS  
13 Program's reviewed and approved all survey procedures and instruments used before  
14 implementation. The board aside providing technical assistance to the program ensures that the  
15 survey complies with the United States Department of Health and Human Services regulations  
16 for the protection of human subjects CFR 46 as well as the laws of the individual countries.  
17 Further information regarding the DHS data usage and ethical standards can be accessed at  
18 <https://dhsprogram.com/data/Access-Instructions.cfm>.  
19  
20  
21  
22

### 23 **Patient and public involvement**

24 Patients and the public were not involved in the design and conduct of this research.  
25  
26

## 27 **RESULTS**

### 28 **Descriptive analysis**

29  
30 The study included 95,056 children under the age of 5 years from 29 SSA countries. The  
31 percentage of children who suffered anaemia was 57% while those who were not anaemic  
32 accounted for 43%. A majority (57%) of the children included in the survey were in rural  
33 households that used unclean cooking fuels. The results indicate that only 13% of children under  
34 the age of 5 years are from households that rely on clean cooking fuel while 87% lived in  
35 households using unclean cooking fuels. Further, the prevalence of anaemia was highest (59%)  
36 among children in urban households that use unclean cooking fuels, and rural households that  
37 use cleaning cooking fuels. Even though a majority of children were in households with an  
38 improved source of drinking water (75%); and improved toilet facility (54%), most of these  
39 children, 58% and 60% respectively suffered anaemia. Child anaemia is high (60%) among  
40 children in rich households, which constitute a slightly higher percentage (41%) of households by  
41 wealth status. Even though a relatively high percentage (35%) of children included in the study  
42 were in rural households of poor wealth status, a majority (59%) of children from rich households  
43 in rural areas were anaemic. On educational attainment of mothers, only a few children (4%)  
44 belonged to mothers who had tertiary education, most (65%) of whom were anaemic.  
45 Notwithstanding the relatively few children from Namibia (1%) and Rwanda (4%) included in the  
46 survey, each recorded 82% child anaemia. Despite accounting for only 4% of the children studied,  
47 Benin recorded the least (31%) prevalence of child anaemia. Categorizing the countries into their  
48 geographical location, we found that, of the 17% and 18% of children from Southern Africa and  
49 Central Africa, 74% of children each region suffered anaemia.  
50  
51  
52  
53  
54  
55  
56  
57  
58  
59

1  
2  
3 The probability (P) value of all variables except the sex of the child was significant. The Pearson  
4 Chi-squared analysis, therefore, rejects the null hypotheses that anaemia level is independent of  
5 the source of drinking water and toilet facility as well as compositional and contextual factors.  
6 These results, therefore, signify that household source of drinking water and type of toilet facility  
7 affect anaemia level of children under five years old. Again, the P-values show that the figures  
8 obtained for anaemia level were not by chance and if the analyses were repeatedly run, the same  
9 results would be obtained. Cramer's v statistics however shows weak to moderate associations  
10 between the key predictor, compositional and contextual factors. Contingency Table 3 shows the  
11 detailed results.  
12  
13  
14  
15

16  
17  
18 \*\*\*Table 3\*\*\*  
19

### 20 Multivariate analysis

21 Table 4 shows the results from the negative log-log regression analysis on the relationship  
22 between the type of household cooking fuel and anaemia among children under five in SSA. In  
23 Model 4, the final model that controlled for all the variables including country, it was found that  
24 children from rural households that depend on unclean cooking fuels were more likely to be  
25 anaemic [AOR=1.028; 95% CI=1.011-1.046] as compared to children from urban households using  
26 unclean cooking fuel. With birthweight, it was found from our study that children with normal  
27 weight had lower odds [AOR=0.969; CI=0.953-0.986] of being anaemic compared to underweight  
28 children. The odds of suffering from anaemia decreased with the age of the child. It was found  
29 that children aged 4 had the lowest odds [AOR=0.935; CI=0.916-0.955] of suffering from anaemia  
30 compared with those less than 1 year (0). With maternal age, compared with those age 15-19, all  
31 the age categories showed statistically significant association with anaemia. However, children  
32 whose mother are aged 45-49 [AOR=0.913; CI=0.863-0.963] and those aged 30-34 [AOR=0.917;  
33 CI=0.887-0.948] had the lowest odds of being anaemic. We also found that children in female-  
34 headed households [AOR=1.023; CI=1.007-1.039]; middle-aged adults [AOR=1.026; CI=1.009-  
35 1.043], old age adults [AOR=1.043; CI=1.021-1.065] were more likely to be anaemic compared  
36 with those in male-headed households; and households headed by young adults. With regards  
37 to the educational attainment of child's mother, children whose mother's highest educational  
38 attainment is the tertiary level had the lowest odds [AOR=0.911; CI=0.872-0.953] of suffering  
39 from anaemia compared with those whose mothers had no formal education.  
40  
41  
42  
43  
44  
45

46 The result shows that children in large households [AOR=1.033; CI=1.008-1.052]; those in  
47 households with the improved source of drinking water [AOR=1.025; CI=1.009-1.041] had higher  
48 odds of being suffering from anaemia compared to those in small household and those whose  
49 source of drinking is unimproved respectively. Children in rich households [AOR=0.963; CI=0.944-  
50 0.982]; those in the household with an improved type of toilet facility [AOR=0.975; CI=0.961-  
51 0.990] had lower odds of being anaemic compared with those in poor households, and  
52 households with unimproved toilet facility respectively. With country, apart from Benin, all the  
53  
54  
55  
56  
57  
58  
59  
60

1  
2  
3 children in the other countries had lower odds of being anaemic with those in Namibia having  
4 the lowest odds [AOR=0.390; CI=0.353-0.430] compared to children in Angola (see Table 4).  
5  
6  
7

8 \*\*\*Table 4\*\*\*  
9

## 10 11 12 **DISCUSSION**

13  
14 In this current study, our principal aim was to investigate the association between household  
15 biomass fuel use, and the joint effect of household biomass fuel use for cooking and urbanicity  
16 on anaemia among children under the age of 5 in SSA. The study showed that children from rural  
17 households that depend on unclean cooking fuels were more likely to be anaemic compared with  
18 children from urban households using unclean cooking fuel. This is in line with previous studies  
19 in various parts of the world such as Timor-Lest [21] and India [15, 22]. Although this study was  
20 a cross-sectional study and could not claim causality, some studies [15] have explained that  
21 exposure to unclean cooking fuels may lead to systemic inflammation which is regarded as a  
22 popular cause of anaemia, mediated by inflammatory cytokines such as tumour necrosis factor-  
23 alpha (TNF- $\alpha$ ), interleukin-1 (IL-1), interleukin-6 (IL-6), and interferon- $\gamma$  (IFN- $\gamma$ ) [37]. The pathways  
24 by which these causes anaemia include dysregulation of iron homeostasis, impaired  
25 erythropoietin response to reduced haemoglobin levels, and impaired marrow response to  
26 erythropoietin [15, 41]. Apart from the key independent variable, we controlled for other key  
27 factors associated with anaemia among children under five which are worth discussing in light of  
28 previous evidence.  
29  
30  
31  
32  
33

34 We found that the birth weight of the child had a statistically significant association with  
35 anaemia. Specifically, children with normal weight had lower odds of being anaemic compared  
36 with underweight children. This aligns with previous studies in Ethiopia [42] and Brazil [43]. Some  
37 previous studies espoused that there is a direct link between food consumption and anaemia.  
38 Due to this, in a household where there is no food security, it can affect the nutritional status of  
39 children, which could contribute to anaemia [44, 45]. Relatedly, we found that children in large  
40 households had higher odds of suffering from anaemia compared to those in a small household.  
41 This finding confirms a previous study in Ethiopia [46]. Insufficient consumption of appropriate  
42 quantity of nutrients due to the high numbers in the households could possibly account for this  
43 observation as explained by [46].  
44  
45  
46  
47

48 The study also established that the socio-economic status (education and wealth) of women had  
49 a statistically significant association with child anaemia. Specifically, it was found that children  
50 whose mothers are in the rich wealth status, as well as those with tertiary level of education,  
51 have lower odds of being anaemic. This corroborates several previous studies in SSA and other  
52 countries such as Ethiopia [42, 47, 48], Brazil [49], Switzerland [50], Burma [51], and India [52].  
53 There are three pathways to the explanation of this finding. First, on the supply side, children  
54 from households with high-socio economic status can buy nutritious foods for their children,  
55  
56  
57  
58  
59  
60



1  
2  
3 unlike the poor ones who might not be able to afford three square meals a day. In other words,  
4 the poor might lack the resources to purchase nutritious foods for their children. Second,  
5 evidence also suggests that mothers in poor households are also anaemic and the probability of  
6 their children also being anaemic is high. Thirdly, in terms of education, mothers who are highly  
7 educated can translate the health education they receive during child welfare clinics into  
8 practice. Besides, those who are highly educated can recognise danger signs related to childhood  
9 illnesses that warrant emergency care [46, 53].  
10  
11  
12

13 Another major finding in our study was that the odds of suffering from anaemia decreased with  
14 the age of the child. This finding is supported by other studies conducted in Ethiopia [54, 42, 44,  
15 55] Ghana [56], and Uganda [57]. The possible reason for this association is that in most cases as  
16 the children grow, they can eat varied foods which might be sufficient in iron and as a result could  
17 prevent the occurrence of anaemia [46]. We also observed a statistically significant association  
18 between maternal age and child's anaemia. Specifically, children whose mothers are aged 45-49  
19 and those aged 30-34 had the lowest odds of being anaemic. This is consistent with previous  
20 studies in Ethiopia [46]. It is possible that as mothers advance in age, they gain experiences with  
21 childcare and also, they are more likely to be exposed to education on appropriate practices on  
22 childhood nutrition compared with those who are adolescents. In line with a previous study [58],  
23 we also found that children in female-headed households, middle-aged adults, old age adults  
24 were more likely to be anaemic compared with those in male-headed households; and  
25 households headed by young adults. Surprisingly, our study showed that children in households  
26 with an improved source of drinking water had higher odds of being anaemic. This is contrary to  
27 other empirical studies in Bangladesh [55], India [22], Benin and Mali [59]. Longitudinal case-  
28 control studies coupled with qualitative evidence are needed to unravel this counter-intuitive  
29 finding.  
30  
31  
32  
33  
34  
35  
36

## 37 CONCLUSION

38 Our study found that there is an association between the joint effect of household biomass fuel  
39 use for cooking and urbanicity and anaemia among children under the age of 5 in SSA. Apart from  
40 this we also found that birth weight of the child, age of the child, maternal age, sex of household  
41 head, age of household head, maternal education, wealth status, size of household, type of  
42 source of drinking water and country of residence are associated with childhood anaemia. The  
43 following recommendations are therefore made for policy and practice. Firstly, it is critical to  
44 promote clean fuel usage among households and women in rural areas. This could be done by  
45 governments in various countries by enhancing access and subsidising the cost of natural and or,  
46 liquified petroleum gas [LPG] and cylinders. Second, it is also imperative to advocate for  
47 improvement in female education which could lead to an improvement in the socio-economic  
48 status of the women. Thirdly, maternal education by community health nurses on the risk factors  
49 of anaemia is also strongly suggested. Stakeholders that seek to improve maternal and child  
50 health should also consider these associated factors.  
51  
52  
53  
54  
55  
56  
57  
58  
59  
60

### Abbreviations

CI: Confidence interval  
DHS: Demographic health survey  
SSA: sub-Saharan Africa  
PM: Particulate Matter  
WHO: World Health Organization

### Acknowledgements

We acknowledge the Demographic Health Surveys for providing us with the data upon which the findings of this study were based. Special thanks to Mr. Eric Duku for his support in spatial representation of child anaemia.

### Contributors

IA contributed to the study design and conceptualization. IA and AA performed the analysis. IA, AS, AA, BOA and SY drafted the initial draft. AS, AA, BOA and SY provided technical support and critically reviewed the manuscript for its intellectual content. SY had final responsibility to submit for publication. All authors read and amended drafts of the paper and approved the final version.

**Funding:** This research received no specific grant from any funding agency in the public, commercial or not-for-profit sectors.

### Ethics approval

Ethics approval was not required for this study since the data is secondary and is available in the public domain. More details regarding DHS data and ethical standards are available at: <http://goo.gl/ny8T6X>.

**Provenance and peer review:** Not commissioned; externally peer reviewed

### Data sharing statement

Data for this study were sourced from Demographic and Health surveys (DHS) and available here: <http://dhsprogram.com/data/available-datasets.cfm>.



## References

1. Ntenda PAM, Nkoka O, Bass P, Senghore T. Maternal anemia is a potential risk factor for anemia in children aged 6--59 months in Southern Africa: a multilevel analysis. *BMC Public Health*. 2018;18(1):650.
2. Roberts DJ, Matthews G, Snow RW, Zewotir T, Sartorius B. Investigating the spatial variation and risk factors of childhood anaemia in four sub-Saharan African countries. *BMC Public Health*. 2020;20(1):126.
3. WHO. Haemoglobin concentrations for the diagnosis of anaemia and assessment of severity. Vitamin and Mineral Nutrition Information System. Geneva, World Health Organization 2011. (<http://www.who.int/vmnis/indicators/haemoglobin.pdf>)
4. Nambiema A, Robert A, Yaya I. Prevalence and risk factors of anemia in children aged from 6 to 59 months in Togo: analysis from Togo demographic and health survey data, 2013--2014. *BMC Public Health*. 2019;19(1):215.
5. Gener JPAD, Glader BE, Paraskevas F, Foerster J, Lukens JN, et al. *Wintrobe's clinical hematology*. 13th ed. Philadelphia: Lippincott Williams & Wilkins; 2013. p. 2312.
6. Soliman AT, De Sanctis V, Kalra S. Anemia and growth. *Indian J Endocrinol Metab*. 2014;18(1):S1-5.
7. Wirth JP, Rohner F, Woodruff BA, Chiwile F, Yankson H, Koroma AS, et al. Anemia, micronutrient deficiencies, and malaria in children and women in Sierra Leone prior to the Ebola outbreak-findings of a cross-sectional study. *PLoS One*. 2016;11(5):e0155031.
8. WHO. Global nutrition targets 2025: anaemia policy brief. Geneva: World Health Organization;2014. [http://apps.who.int/iris/bitstream/10665/148556/1/WHO\\_NMH\\_NH\\_14.4\\_eng.pdf?ua=1](http://apps.who.int/iris/bitstream/10665/148556/1/WHO_NMH_NH_14.4_eng.pdf?ua=1).
9. Mishra V, Retherford RD. Does biofuel smoke contribute to anaemia and stunting in early childhood? *Int J Epidemiol*. 2007;36(1):117-29.
10. Van Gemert F, Chavannes N, Kirenga B, Jones R, Williams S, Tsiligianni I, et al. Socio-economic factors, gender and smoking as determinants of COPD in a low-income country of sub-Saharan Africa: FRESH AIR Uganda. *NPJ Prim care Respir Med*. 2016;26(1):1-6.
11. Machisa M, Wichmann J, Nyasulu PS. Biomass fuel use for household cooking in Swaziland: is there an association with anaemia and stunting in children aged 6--36 months? *Trans R Soc Trop Med Hyg*. 2013;107(9):535-44.

12. Woolley KE, Bagambe T, Singh A, Avis WR, Kabera T, Weldetinsae A, et al. Investigating the Association between Wood and Charcoal Domestic Cooking, Respiratory Symptoms and Acute Respiratory Infections among Children Aged Under 5 Years in Uganda: A Cross-Sectional Analysis of the 2016 Demographic and Health Survey. *Int J Environ Res Public Health*. 2020;17(11):3974.
13. WHO. Air quality guidelines for particulate matter, ozone, nitrogen dioxide and sulfur dioxide: global update 2005: summary of risk assessment. 2006.
14. Amegah AK, Boachie J, Näyhä S, Jaakkola JJK. Association of biomass fuel use with reduced body weight of adult Ghanaian women. *J Expo Sci Environ Epidemiol*. 2019;1.
15. Page CM, Patel A, Hibberd PL. Does smoke from biomass fuel contribute to Anemia in pregnant women in Nagpur, India? A cross-sectional study. *PLoS One*. 2015;10(5):1–13.
16. Kyu HH, Georgiades K, Boyle MH. Biofuel smoke and child anemia in 29 developing countries: a multilevel analysis. *Ann Epidemiol*. 2010;20(11):811–7.
17. Desai MA, Mehta S, Smith KR, Organization WH, others. Indoor smoke from solid fuels: assessing the environmental burden of disease at national and local levels. World Health Organization; 2004.
18. WHO. Air quality guidelines for particulate matter, ozone, nitrogen dioxide and sulfur dioxide. Global update 2005. Summary of risk assessment. Geneva: World Health Organization; 2006, WHO/SDE/PHE/OEH/06.02.
19. Begum BA, Paul SK, Hossain MD, Biswas SK, Hopke PK. Indoor air pollution from particulate matter emissions in different households in rural areas of Bangladesh. *Build Environ*. 2009;44(5):898–903.
20. Chakraborty D, Mondal NK, Datta JK. Indoor pollution from solid biomass fuel and rural health damage: A micro-environmental study in rural area of Burdwan, West Bengal. *Int J Sustain built Environ*. 2014;3(2):262–71.
21. Pinto VS. An analysis of association between using solid fuel and anemia among reproductive age women, 15-49 years old in Timor-Leste. 2016;
22. Baranwal A, Baranwal A, Roy N. Association of household environment and prevalence of anemia among children under-5 in India. *Front public Heal*. 2014;2:196.
23. Epstein MB, Bates MN, Arora NK, Balakrishnan K, Jack DW, Smith KR. Household fuels, low birth weight, and neonatal death in India: the separate impacts of biomass, kerosene, and coal. *Int J Hyg Environ Health*. 2013;216(5):523–32.
24. Ali SA, Khan U, Feroz A. Prevalence and Determinants of Anemia among Women of Reproductive Age in Developing Countries. *J Coll Physicians Surg Pakistan*. 2020;30(2):177–86.

- 1
  - 2
  - 3
  - 4
  - 5
  - 6
  - 7
  - 8
  - 9
  - 10
  - 11
  - 12
  - 13
  - 14
  - 15
  - 16
  - 17
  - 18
  - 19
  - 20
  - 21
  - 22
  - 23
  - 24
  - 25
  - 26
  - 27
  - 28
  - 29
  - 30
  - 31
  - 32
  - 33
  - 34
  - 35
  - 36
  - 37
  - 38
  - 39
  - 40
  - 41
  - 42
  - 43
  - 44
  - 45
  - 46
  - 47
  - 48
  - 49
  - 50
  - 51
  - 52
  - 53
  - 54
  - 55
  - 56
  - 57
  - 58
  - 59
  - 60
25. Naz S, Page A, Agho KE. Household air pollution from use of cooking fuel and under-five mortality: The role of breastfeeding status and kitchen location in Pakistan. *PLoS One*. 2017;12(3):e0173256.
26. Sreeramareddy CT, Shidhaye RR, Sathiakumar N. Association between biomass fuel use and maternal report of child size at birth-an analysis of 2005-06 India Demographic Health Survey data. *BMC Public Health*. 2011;11(1):403.
27. Yaya S, Uthman OA, Ekholuenetale M, Bishwajit G, Adjiwanou V. Effects of birth spacing on adverse childhood health outcomes: evidence from 34 countries in sub-Saharan Africa. *The Journal of Maternal-Fetal & Neonatal Medicine*. 2019 Feb 8:1-8.
28. World Health Organization. Progress on drinking water, sanitation and hygiene: 2017 update and SDG baselines.
29. Armah FA, Ekumah B, Yawson DO, Odoi JO, Afitiri A-R, Nyieku FE. Access to improved water and sanitation in sub-Saharan Africa in a quarter century. *Heliyon*. 2018;4(11):e00931.
30. Armah FA, Ekumah B, Yawson DO, Odoi JO, Afitiri AR, Nyieku FE. Access to improved water and sanitation in sub-Saharan Africa in a quarter century. *Heliyon*. 2018 Nov 1;4(11):e00931.
31. Armah FA, Ekumah B, Yawson DO, Odoi JO, Afitiri AR, Nyieku FE. Predictive probabilities of access to clean cooking: evidence from the demographic and health surveys in 31 countries in sub-Saharan Africa. *Environmental Justice*. 2019 Jun 1;12(3):118-31.
32. Zhou N, Cui Z, Yang S, Han X, Chen G, Zhou Z, Zhai C, Ma M, Li L, Cai M, Li Y. Air pollution and decreased semen quality: a comparative study of Chongqing urban and rural areas. *Environmental Pollution*. 2014 Apr 1;187:145-52.
33. Hulin M, Caillaud D, Annesi-Maesano I. Indoor air pollution and childhood asthma: variations between urban and rural areas. *Indoor air*. 2010 Dec;20(6):502-14.
34. Collins J, Ward BM, Snow P, Kippen S, Judd F. Compositional, contextual, and collective community factors in mental health and well-being in Australian rural communities. *Qual Health Res*. 2017;27(5):677-87.
35. Pol LG, Thomas RK. The demography of health and health care. Springer Science & Business Media; 2001.
36. Ross CE, Mirowsky J. Neighborhood socioeconomic status and health: context or composition? *City Community*. 2008;7(2):163-79.
37. Aitkin MA, Aitkin M, Francis B, Hinde J. Statistical modelling in GLIM 4. Vol. 32. OUP Oxford; 2005.

- 1  
2  
3 38. Armah FA, Quansah R, Yawson DO, Abdul Kadir L. Assessment of Self-Reported Adverse  
4 Health Outcomes of Electronic Waste Workers Exposed to Xenobiotics in Ghana. *Environmental*  
5 *Justice*. 2019 Apr 1;12(2):69-84.  
6  
7  
8 39. Fahrmeir L, Tutz G. *Multivariate statistical modelling based on generalized linear models*.  
9 Springer Science & Business Media; 2013.  
10  
11 40. Mulenga JN, Bwalya BB, Kaliba-Chishimba K. Determinants and inequalities in access to  
12 improved water sources and sanitation among the Zambian households. *Int J Dev Sustain*.  
13 2017;6(8):746–62.  
14  
15 41. Weiss G, Goodnough LT. Anemia of chronic disease. *N Engl J Med*. 2005;352(10):1011–23.  
16  
17 42. Gebreegziabiher G, Etana B, Niggusie D. Determinants of anemia among children aged 6--59  
18 months living in Kilte Awulaelo Woreda, Northern Ethiopia. *Anemia*. 2014;2014.  
19  
20 43. Santos RF dos, Gonzalez ESC, Albuquerque EC de, Arruda IKG de, Diniz A da S, Figueroa JN, et  
21 al. Prevalence of anemia in under five-year-old children in a children's hospital in Recife, Brazil.  
22 *Rev Bras Hematol Hemoter*. 2011;33(2):100–4.  
23  
24 44. Ali D, Saha KK, Nguyen PH, Diressie MT, Ruel MT, Menon P, et al. Household food insecurity  
25 is associated with higher child undernutrition in Bangladesh, Ethiopia, and Vietnam, but the  
26 effect is not mediated by child dietary diversity. *J Nutr*. 2013;143(12):2015–21.  
27  
28 45. Gebreweld A, Ali N, Ali R, Fisha T. Prevalence of anemia and its associated factors among  
29 children under five years of age attending at Gugufu health center, South Wollo, Northeast  
30 Ethiopia. *PLoS One*. 2019;14(7):e0218961.  
31  
32 46. Asresie MB, Fekadu GA, Dagne GW. Determinants of Anemia among Children Aged 6--59  
33 Months in Ethiopia: Further Analysis of the 2016 Ethiopian Demographic Health Survey. *Adv*  
34 *Public Heal*. 2020;2020.  
35  
36 47. Kawo KN, Asfaw ZG, Yohannes N. Multilevel analysis of determinants of anemia prevalence  
37 among children aged 6--59 Months in Ethiopia: classical and bayesian approaches. *Anemia*.  
38 2018;2018.  
39  
40 48. Woldie H, Kebede Y, Tariku A. Factors associated with anemia among children aged 6--23  
41 months attending growth monitoring at Tsitsika Health Center, Wag-Himra Zone, Northeast  
42 Ethiopia. *J Nutr Metab*. 2015;2015.  
43  
44 49. Muniz PT, Castro TG de, Araújo TS de, Nunes NB, Silva-Nunes M da, Hoffmann EHE, et al.  
45 Child health and nutrition in the Western Brazilian Amazon: population-based surveys in two  
46 counties in Acre State. *Cad Saude Publica*. 2007;23(6):1283–93.  
47  
48  
49  
50  
51  
52  
53  
54  
55  
56  
57  
58  
59  
60

- 1  
2  
3 50. Prieto-Patron A, der Horst K, Hutton Z V, Detzel P. Association between anaemia in children  
4 6 to 23 months old and child, mother, household and feeding indicators. *Nutrients*.  
5 2018;10(9):1269.  
6  
7  
8 51. Zhao A, Zhang Y, Peng Y, Li J, Yang T, Liu Z, et al. Prevalence of anemia and its risk factors  
9 among children 6--36 months old in Burma. *Am J Trop Med Hyg*. 2012;87(2):306–11.  
10  
11 52. Pasricha S-R, Black J, Muthayya S, Shet A, Bhat V, Nagaraj S, et al. Determinants of Anemia  
12 Among Young Children in Rural India. *Pediatrics* [Internet]. 2010 Jul 1;126(1):e140 LP-e149.  
13 Available from: <http://pediatrics.aappublications.org/content/126/1/e140.abstract>  
14  
15 53. Agbozo F, Colecraft E, Jahn A, Guetterman T. Understanding why child welfare clinic  
16 attendance and growth of children in the nutrition surveillance programme is below target:  
17 lessons learnt from a mixed methods study in Ghana. *BMC Nurs*. 2018;17(1):25.  
18  
19  
20 54. Abdi Guled R, Mamat NM, Balachew T, Bakar MA, Azdie W, Assefa N. Predictors and  
21 prevalence of anemia, among children aged 6 to 59 months in shebelle zone, Somali region,  
22 eastern Ethiopia: a cross sectional study. *International Journal of Development Research*.  
23 2017;7(1):11189-96.  
24  
25 55. Khan JR, Awan N, Misu F. Determinants of anemia among 6--59 months aged children in  
26 Bangladesh: evidence from nationally representative data. *BMC Pediatr*. 2016;16(1):3.  
27  
28 56. Parbey PA, Kyei-Duodu G, Takramah W, Tarkang E, Agboli E, Takase M, et al. Prevalence of  
29 anaemia and associated risk factors among children under five years in hohoe municipality,  
30 Ghana. *J Sci Res Reports*. 2017;1–12.  
31  
32 57. Kuziga F, Adoke Y, Wanyenze RK. Prevalence and factors associated with anaemia among  
33 children aged 6 to 59 months in Namutumba district, Uganda: a cross-sectional study. *BMC*  
34 *Pediatr*. 2017;17(1):25.  
35  
36 58. Engidaye G, Melku M, Yalew A, Getaneh Z, Asrie F, Enawgaw B. Under nutrition, maternal  
37 anemia and household food insecurity are risk factors of anemia among preschool aged children  
38 in Menz Gera Midir district, Eastern Amhara, Ethiopia: a community based cross-sectional study.  
39 *BMC Public Health*. 2019;19(1):968.  
40  
41 59. Ngnie-Teta I, Receveur O, Kuate-Defo B. Risk factors for moderate to severe anemia among  
42 children in Benin and Mali: insights from a multilevel analysis. *Food Nutr Bull*. 2007;28(1):76–89.  
43  
44  
45  
46  
47  
48  
49  
50  
51  
52  
53  
54  
55  
56  
57  
58  
59  
60

## Supplementary material

Supplementary file 1. Multicollinearity diagnosis

### Figure Legends

Figure 1. Map of study countries showing the distribution of child under age five years anaemia status

**Table 1.** Selected countries and available dataset

| Country       | Year(n)      | Country      | Year(n)      |
|---------------|--------------|--------------|--------------|
| Angola        | 2016 (5,390) | Malawi       | 2016 (4,769) |
| Benin         | 2018 (3,430) | Mali         | 2018 (1,659) |
| Burkina Faso  | 2010 (6,674) | Mozambique   | 2015 (3,824) |
| Burundi       | 2017 (6,519) | Namibia      | 2013 (1,913) |
| Cameroon      | 2019 (3,135) | Niger        | 2012 (1,325) |
| Congo         | 2012 (3,309) | Nigeria      | 2018 (3,392) |
| Cote D'Ivoire | 2012 (2,082) | Rwanda       | 2015 (3,476) |
| DR Congo      | 2014 (3,849) | Sierra Leone | 2013 (2,398) |
| Ethiopia      | 2016 (1,896) | Senegal      | 2017 (2,881) |
| Gabon         | 2012 (3,185) | Tanzania     | 2016 (5,812) |
| Gambia        | 2013 (1,556) | Togo         | 2014 (1,948) |
| Ghana         | 2014 (1,578) | Uganda       | 2016 (3,168) |
| Guinea        | 2018 (1,773) | Zambia       | 2019 (7,384) |
| Lesotho       | 2014 (1,235) | Zimbabwe     | 2015 (4,737) |
| South Africa  | 2016 (1,084) |              |              |

**Table 2.** Classification of the source of drinking water and toilet facilities under the WHO/UNICEF Joint Monitoring Programme and cooking fuel.

| <b>Service</b>            | <b>Improved/Clean</b>                                                                                                                                   | <b>Unimproved/Unclean</b>                                                                            |
|---------------------------|---------------------------------------------------------------------------------------------------------------------------------------------------------|------------------------------------------------------------------------------------------------------|
| Drinking water sources    | Piped water, boreholes or tube wells, protected dug wells, protected springs, rainwater, and packaged or delivered water.                               | Unprotected dug well, unprotected spring, river, dam, lake, pond, stream, canal and irrigation canal |
| Type of toilet facilities | Flush/pour flush to piped sewer systems, septic tanks or pit latrines, ventilated improved pit latrines, composting toilets or pit latrines with slabs. | Pit latrines without a slab or platform, hanging latrines or bucket latrines and open defecation.    |
| Cooking fuel type         | Electricity, liquid petroleum gas (LPG), natural gas and biogas                                                                                         | Kerosene, coal/lignite, charcoal, wood, straw/shrubs/grass and animal dung                           |

**Table 3.** Percentage distribution of Anaemia level by predictor variables.

| Variable $\chi^2$ (df) (p-value; Cramer's V)                                                               | Weighted n | Weighted % | Anaemia status |        |
|------------------------------------------------------------------------------------------------------------|------------|------------|----------------|--------|
|                                                                                                            |            |            | Yes (%)        | No (%) |
| <b>Household cooking fuel <math>\chi^2=0.2206</math> (1); (p=0.639; Cramér's V = 0.0015)</b>               |            |            |                |        |
| Unclean                                                                                                    | 83,077     | 87         | 57             | 43     |
| Clean                                                                                                      | 11,978     | 13         | 57             | 43     |
| <b>Household cooking fuel Urbanicity <math>\chi^2=38.3022</math> (3); (p&lt;0.001; Cramér's V =0.0200)</b> |            |            |                |        |
| Unclean Urban                                                                                              | 29,148     | 31         | 59             | 41     |
| Unclean Rural                                                                                              | 53,930     | 57         | 56             | 44     |
| Clean Urban                                                                                                | 6,055      | 6          | 56             | 44     |
| Clean Rural                                                                                                | 5,923      | 6          | 59             | 42     |
| <b>Drinking water source <math>\chi^2=80.0251</math> (1); (p&lt;0.001; Cramér's V = -0.0290)</b>           |            |            |                |        |
| Unimproved                                                                                                 | 23,298     | 25         | 54             | 46     |
| Improved                                                                                                   | 71,758     | 75         | 58             | 42     |
| <b>Type of toilet facility <math>\chi^2=357.2000</math> (1); (p&lt;0.001; Cramér's V = -0.0612)</b>        |            |            |                |        |
| Unimproved                                                                                                 | 43,618     | 46         | 54             | 46     |
| Improved                                                                                                   | 51,438     | 54         | 60             | 40     |
| <b>Wealth status <math>\chi^2= 281.9885</math>(2); (p&lt;0.001; Cramér's V =0.0544)</b>                    |            |            |                |        |
| Poor                                                                                                       | 37,185     | 39         | 55             | 45     |
| Middle                                                                                                     | 18,619     | 20         | 54             | 46     |
| Rich                                                                                                       | 39,251     | 41         | 60             | 40     |
| <b>Sex of child <math>\chi^2= 3.5696</math>(1); (p=0.059; Cramér's V =-0.0061)</b>                         |            |            |                |        |
| Male                                                                                                       | 47,997     | 50         | 57             | 43     |
| Female                                                                                                     | 47,058     | 50         | 57             | 43     |
| <b>Birth weight <math>\chi^2=17.9842</math>(1); (p&lt;0.001; Cramér's V = -0.0140)</b>                     |            |            |                |        |
| Under weight                                                                                               | 13,571     | 15         | 56             | 44     |
| Normal                                                                                                     | 77,283     | 85         | 58             | 42     |
| <b>Current age of child <math>\chi^2= 58.1591</math>(4); (p&lt;0.001; Cramér's V = 0.0252)</b>             |            |            |                |        |
| 0                                                                                                          | 17,418     | 19         | 56             | 44     |
| 1                                                                                                          | 20,043     | 22         | 55             | 45     |
| 2                                                                                                          | 18,454     | 20         | 57             | 43     |
| 3                                                                                                          | 18,205     | 20         | 58             | 42     |
| 4                                                                                                          | 16,878     | 19         | 59             | 41     |
| <b>Age of mother(years) <math>\chi^2= 111.3956</math>(6); (p&lt;0.001; Cramér's V = 0.0342)</b>            |            |            |                |        |
| 15-19                                                                                                      | 1,415      | 7          | 56             | 44     |
| 20-24                                                                                                      | 4,784      | 22         | 59             | 41     |
| 25-29                                                                                                      | 5,830      | 27         | 57             | 43     |
| 30-34                                                                                                      | 4,745      | 22         | 55             | 45     |
| 35-39                                                                                                      | 3,246      | 15         | 54             | 46     |
| 40-44                                                                                                      | 1,328      | 6          | 57             | 43     |



|                                                                                                                            |        |    |    |    |
|----------------------------------------------------------------------------------------------------------------------------|--------|----|----|----|
| 45-49                                                                                                                      | 342    | 2  | 56 | 44 |
| <b>Urbanicity Wealth <math>\chi^2= 395.6355(5)</math>; (<math>p&lt;0.001</math>; Cramér's V = 0.0644)</b>                  |        |    |    |    |
| Urban Poor                                                                                                                 | 4,187  | 4  | 50 | 50 |
| Urban Middle                                                                                                               | 4,735  | 5  | 50 | 50 |
| Urban Rich                                                                                                                 | 26,281 | 28 | 61 | 39 |
| Rural Poor                                                                                                                 | 32,998 | 35 | 55 | 45 |
| Rural Middle                                                                                                               | 13,884 | 15 | 56 | 44 |
| Rural Rich                                                                                                                 | 12,970 | 14 | 59 | 41 |
| <b>Birth order number <math>\chi^2= 128.4928(4)</math>; (<math>p&lt;0.001</math>; Cramér's V =0.0367)</b>                  |        |    |    |    |
| 1                                                                                                                          | 23,293 | 25 | 59 | 41 |
| 2                                                                                                                          | 19,367 | 20 | 58 | 42 |
| 3                                                                                                                          | 15,437 | 16 | 58 | 42 |
| 4                                                                                                                          | 11,803 | 12 | 56 | 44 |
| 5 and above                                                                                                                | 25,155 | 26 | 54 | 46 |
| <b>Age of household head <math>\chi^2= 116.8819(2)</math>; (<math>p&lt;0.001</math>; Cramér's V = 0.0350)</b>              |        |    |    |    |
| Young adult                                                                                                                | 37,260 | 39 | 59 | 41 |
| Middle-aged adult                                                                                                          | 44,680 | 47 | 56 | 44 |
| Older adults                                                                                                               | 13,115 | 14 | 54 | 46 |
| <b>Mother's highest level of education <math>\chi^2= 1.1e+03(3)</math>; (<math>p&lt;0.001</math>; Cramér's V = 0.1056)</b> |        |    |    |    |
| No formal education                                                                                                        | 28,082 | 30 | 49 | 51 |
| Primary                                                                                                                    | 35,506 | 37 | 59 | 41 |
| Secondary                                                                                                                  | 27,968 | 29 | 61 | 39 |
| Tertiary                                                                                                                   | 3,499  | 4  | 65 | 35 |
| <b>Household size <math>\chi^2= 306.2649(2)</math>; (<math>p&lt;0.001</math>; Cramér's V = 0.0567)</b>                     |        |    |    |    |
| Small                                                                                                                      | 41,898 | 44 | 59 | 41 |
| Medium                                                                                                                     | 41,620 | 44 | 57 | 43 |
| Large                                                                                                                      | 11,538 | 12 | 50 | 50 |
| <b>Country <math>\chi^2= 7.3e+03 (28)</math>; (<math>p&lt;0.001</math>; Cramér's V =0.2773)</b>                            |        |    |    |    |
| Angola                                                                                                                     | 5,038  | 5  | 37 | 63 |
| Benin                                                                                                                      | 3,533  | 4  | 31 | 69 |
| Burkina Faso                                                                                                               | 7,030  | 7  | 52 | 48 |
| Burundi                                                                                                                    | 6,722  | 7  | 58 | 42 |
| Cameroon                                                                                                                   | 3,345  | 4  | 61 | 39 |
| Congo                                                                                                                      | 1,653  | 2  | 48 | 52 |
| Cote D'Ivoire                                                                                                              | 1,906  | 2  | 45 | 55 |
| DR Congo                                                                                                                   | 3,737  | 4  | 58 | 42 |
| Ethiopia                                                                                                                   | 1,919  | 2  | 75 | 25 |
| Gabon                                                                                                                      | 2,858  | 3  | 43 | 57 |
| Gambia                                                                                                                     | 1,707  | 2  | 39 | 61 |
| Ghana                                                                                                                      | 1,412  | 1  | 58 | 42 |
| Guinea                                                                                                                     | 1,675  | 2  | 56 | 44 |
| Lesotho                                                                                                                    | 1,202  | 1  | 72 | 28 |

|    |                                                                                             |        |    |    |    |
|----|---------------------------------------------------------------------------------------------|--------|----|----|----|
| 1  |                                                                                             |        |    |    |    |
| 2  |                                                                                             |        |    |    |    |
| 3  | Malawi                                                                                      | 4,773  | 5  | 69 | 31 |
| 4  | Mali                                                                                        | 2,136  | 2  | 44 | 56 |
| 5  | Mozambique                                                                                  | 4,102  | 4  | 39 | 61 |
| 6  | Namibia                                                                                     | 1,831  | 2  | 82 | 18 |
| 7  | Niger                                                                                       | 1,428  | 2  | 59 | 41 |
| 8  | Nigeria                                                                                     | 2,758  | 3  | 46 | 54 |
| 9  | Rwanda                                                                                      | 3,547  | 4  | 82 | 18 |
| 10 | Sierra Leone                                                                                | 2,425  | 3  | 55 | 45 |
| 11 | Senegal                                                                                     | 2,484  | 3  | 49 | 51 |
| 12 | Tanzania                                                                                    | 7,430  | 8  | 54 | 46 |
| 13 | Togo                                                                                        | 1,853  | 2  | 56 | 44 |
| 14 | Uganda                                                                                      | 3,415  | 4  | 69 | 31 |
| 15 | Zambia                                                                                      | 7,174  | 8  | 73 | 27 |
| 16 | Zimbabwe                                                                                    | 4,891  | 5  | 75 | 25 |
| 17 | South Africa                                                                                | 1,069  | 1  | 72 | 28 |
| 18 |                                                                                             |        |    |    |    |
| 19 |                                                                                             |        |    |    |    |
| 20 |                                                                                             |        |    |    |    |
| 21 |                                                                                             |        |    |    |    |
| 22 | <b>Geographic region <math>\chi^2= 3.9e+03</math> (3); (p&lt;0.001; Cramér's V =0.2019)</b> |        |    |    |    |
| 23 | Western Africa                                                                              | 30,348 | 32 | 48 | 52 |
| 24 | Eastern Africa                                                                              | 31,909 | 34 | 61 | 39 |
| 25 | Southern Africa                                                                             | 16,167 | 17 | 74 | 26 |
| 26 | Central Africa                                                                              | 16,632 | 18 | 74 | 26 |
| 27 |                                                                                             |        |    |    |    |
| 28 |                                                                                             |        |    |    |    |
| 29 |                                                                                             |        |    |    |    |
| 30 |                                                                                             |        |    |    |    |
| 31 |                                                                                             |        |    |    |    |
| 32 |                                                                                             |        |    |    |    |
| 33 |                                                                                             |        |    |    |    |
| 34 |                                                                                             |        |    |    |    |
| 35 |                                                                                             |        |    |    |    |
| 36 |                                                                                             |        |    |    |    |
| 37 |                                                                                             |        |    |    |    |
| 38 |                                                                                             |        |    |    |    |
| 39 |                                                                                             |        |    |    |    |
| 40 |                                                                                             |        |    |    |    |
| 41 |                                                                                             |        |    |    |    |
| 42 |                                                                                             |        |    |    |    |
| 43 |                                                                                             |        |    |    |    |
| 44 |                                                                                             |        |    |    |    |
| 45 |                                                                                             |        |    |    |    |
| 46 |                                                                                             |        |    |    |    |
| 47 |                                                                                             |        |    |    |    |
| 48 |                                                                                             |        |    |    |    |
| 49 |                                                                                             |        |    |    |    |
| 50 |                                                                                             |        |    |    |    |
| 51 |                                                                                             |        |    |    |    |
| 52 |                                                                                             |        |    |    |    |
| 53 |                                                                                             |        |    |    |    |
| 54 |                                                                                             |        |    |    |    |
| 55 |                                                                                             |        |    |    |    |
| 56 |                                                                                             |        |    |    |    |
| 57 |                                                                                             |        |    |    |    |
| 58 |                                                                                             |        |    |    |    |
| 59 |                                                                                             |        |    |    |    |
| 60 |                                                                                             |        |    |    |    |

**Table 4.** Negative log-log regression model showing the relationship between Anaemia status and predictor variables

| Variables                                                     | Key Predictor |           |         |                |       | Key Predictor + Biosocial factors |           |         |                |       | Socio-cultural factors |           |         |                | Contextual factors |       |           |         |                |         |
|---------------------------------------------------------------|---------------|-----------|---------|----------------|-------|-----------------------------------|-----------|---------|----------------|-------|------------------------|-----------|---------|----------------|--------------------|-------|-----------|---------|----------------|---------|
|                                                               | OR            | Robust SE | P value | Conf. Interval |       | AOR                               | Robust SE | P value | Conf. Interval |       | AOR                    | Robust SE | P value | Conf. Interval |                    | AOR   | Robust SE | P value | Conf. Interval |         |
| <b>Household cooking fuel Urbanicity (ref: Unclean Urban)</b> |               |           |         |                |       |                                   |           |         |                |       |                        |           |         |                |                    |       |           |         |                |         |
| Unclean Rural                                                 | 1.040         | 0.007     | <0.001  | 1.026          | 1.055 | 1.027                             | 0.008     | <0.001  | 1.012          | 1.042 | 0.940                  | 0.008     | <0.001  | 0.924          | 0.956              | 1.028 | 0.009     | 0.001   | 1.011          | 1.046   |
| Clean Urban                                                   | 1.037         | 0.015     | 0.015   | 1.007          | 1.067 | 1.043                             | 0.016     | 0.006   | 1.012          | 1.074 | 1.043                  | 0.016     | 0.005   | 1.013          | 1.074              | 1.004 | 0.015     | 0.785   | 0.975          | 1.034   |
| Clean Rural                                                   | 1.001         | 0.015     | 0.972   | 0.972          | 1.030 | 0.997                             | 0.016     | 0.832   | 0.966          | 1.028 | 0.928                  | 0.015     | <0.001  | 0.899          | 0.958              | 1.003 | 0.016     | 0.847   | 0.973          | 1.034   |
| <b>Birth weight (ref: Underweight)</b>                        |               |           |         |                |       |                                   |           |         |                |       |                        |           |         |                |                    |       |           |         |                |         |
| Normal                                                        |               |           |         |                |       | 0.967                             | 0.009     | <0.001  | 0.950          | 0.984 | 0.973                  | 0.009     | 0.002   | 0.956          | 0.990              | 0.969 | 0.008     | <0.001  | 0.953          | 0.986   |
| <b>Sex (ref: Male)</b>                                        |               |           |         |                |       |                                   |           |         |                |       |                        |           |         |                |                    |       |           |         |                |         |
| Female                                                        |               |           |         |                |       | 0.992                             | 0.007     | 0.225   | 0.979          | 1.005 | 0.992                  | 0.007     | 0.228   | 0.979          | 1.005              | 0.996 | 0.006     | 0.525   | 0.984          | 1.008   |
| <b>Current age of child (ref: 0)</b>                          |               |           |         |                |       |                                   |           |         |                |       |                        |           |         |                |                    |       |           |         |                |         |
| 1                                                             |               |           |         |                |       | 1.003                             | 0.010     | 0.803   | 0.983          | 1.023 | 0.998                  | 0.010     | 0.809   | 0.978          | 1.017              | 0.969 | 0.009     | 0.001   | 0.951          | 0.987   |
| 2                                                             |               |           |         |                |       | 0.984                             | 0.010     | 0.121   | 0.964          | 1.004 | 0.983                  | 0.010     | 0.074   | 0.963          | 1.003              | 0.957 | 0.009     | <0.001  | 0.939          | 0.976   |
| 3                                                             |               |           |         |                |       | 0.974                             | 0.011     | 0.015   | 0.953          | 0.995 | 0.974                  | 0.010     | 0.015   | 0.954          | 0.995              | 0.949 | 0.010     | <0.001  | 0.930          | 0.968   |
| 4                                                             |               |           |         |                |       | 0.956                             | 0.011     | <0.001  | 0.936          | 0.978 | 0.961                  | 0.011     | <0.001  | 0.940          | 0.983              | 0.935 | 0.010     | <0.001  | 0.916          | 0.955   |
| <b>Age of mother (ref: 15-19)</b>                             |               |           |         |                |       |                                   |           |         |                |       |                        |           |         |                |                    |       |           |         |                |         |
| 20-24                                                         |               |           |         |                |       | 0.948                             | 0.014     | <0.001  | 0.921          | 0.976 | 0.935                  | 0.014     | <0.001  | 0.908          | 0.963              | 0.957 | 0.013     | 0.002   | 0.932          | 0.983   |
| 25-29                                                         |               |           |         |                |       | 0.943                             | 0.014     | <0.001  | 0.917          | 0.970 | 0.900                  | 0.015     | <0.001  | 0.871          | 0.929              | 0.937 | 0.014     | <0.001  | 0.909          | 0.966   |
| 30-34                                                         |               |           |         |                |       | 0.919                             | 0.014     | <0.001  | 0.892          | 0.947 | 0.857                  | 0.016     | <0.001  | 0.827          | 0.889              | 0.917 | 0.016     | <0.001  | 0.887          | 0.948   |
| 35-39                                                         |               |           |         |                |       | 0.943                             | 0.015     | <0.001  | 0.914          | 0.972 | 0.871                  | 0.017     | <0.001  | 0.837          | 0.905              | 0.935 | 0.018     | <0.001  | 0.901          | 0.970   |
| 40-44                                                         |               |           |         |                |       | 0.943                             | 0.017     | 0.001   | 0.910          | 0.978 | 0.855                  | 0.019     | <0.001  | 0.818          | 0.893              | 0.925 | 0.020     | <0.001  | 0.887          | 0.964   |
| 45-49                                                         |               |           |         |                |       | 0.957                             | 0.025     | 0.100   | 0.909          | 1.008 | 0.846                  | 0.025     | <0.001  | 0.798          | 0.896              | 0.913 | 0.026     | 0.001   | 0.863          | 0.96305 |
| <b>Sex of household head (ref: Male)</b>                      |               |           |         |                |       |                                   |           |         |                |       |                        |           |         |                |                    |       |           |         |                |         |
| Female                                                        |               |           |         |                |       | 0.983                             | 0.008     | 0.039   | 0.967          | 0.999 | 1.003                  | 0.008     | 0.675   | 0.987          | 1.020              | 1.023 | 0.008     | 0.004   | 1.007          | 1.039   |
| <b>Age of household head (ref: Young adults)</b>              |               |           |         |                |       |                                   |           |         |                |       |                        |           |         |                |                    |       |           |         |                |         |
| Middle-aged adults                                            |               |           |         |                |       | 1.065                             | 0.009     | <0.001  | 1.048          | 1.082 | 1.039                  | 0.009     | <0.001  | 1.021          | 1.057              | 1.026 | 0.009     | 0.002   | 1.009          | 1.043   |

|                                                             |  |       |       |        |       |       |       |       |        |       |       |       |       |        |       |       |
|-------------------------------------------------------------|--|-------|-------|--------|-------|-------|-------|-------|--------|-------|-------|-------|-------|--------|-------|-------|
| Old-aged adults                                             |  | 1.111 | 0.011 | <0.001 | 1.089 | 1.133 | 1.062 | 0.012 | <0.001 | 1.039 | 1.086 | 1.043 | 0.011 | <0.001 | 1.021 | 1.065 |
| <b>Educational attainment of mother (ref: No education)</b> |  |       |       |        |       |       |       |       |        |       |       |       |       |        |       |       |
| Primary                                                     |  |       |       |        |       |       | 0.843 | 0.007 | <0.001 | 0.830 | 0.857 | 0.950 | 0.008 | <0.001 | 0.934 | 0.966 |
| Secondary                                                   |  |       |       |        |       |       | 0.835 | 0.008 | <0.001 | 0.820 | 0.851 | 0.937 | 0.009 | <0.001 | 0.919 | 0.956 |
| Tertiary                                                    |  |       |       |        |       |       | 0.820 | 0.018 | <0.001 | 0.785 | 0.857 | 0.911 | 0.021 | <0.001 | 0.872 | 0.953 |
| <b>Birth order number (ref: 1)</b>                          |  |       |       |        |       |       |       |       |        |       |       |       |       |        |       |       |
| 2                                                           |  |       |       |        |       |       | 1.035 | 0.011 | 0.002  | 1.013 | 1.058 | 1.016 | 0.011 | 0.128  | 0.995 | 1.037 |
| 3                                                           |  |       |       |        |       |       | 1.042 | 0.013 | 0.001  | 1.016 | 1.069 | 1.009 | 0.012 | 0.463  | 0.985 | 1.033 |
| 4                                                           |  |       |       |        |       |       | 1.068 | 0.016 | <0.001 | 1.038 | 1.099 | 1.025 | 0.014 | 0.070  | 0.998 | 1.054 |
| 5 and above                                                 |  |       |       |        |       |       | 1.074 | 0.016 | <0.001 | 1.042 | 1.106 | 1.019 | 0.015 | 0.180  | 0.991 | 1.048 |
| <b>Household size (ref: Small)</b>                          |  |       |       |        |       |       |       |       |        |       |       |       |       |        |       |       |
| Medium                                                      |  |       |       |        |       |       | 1.022 | 0.009 | 0.010  | 1.005 | 1.039 | 1.008 | 0.008 | 0.334  | 0.992 | 1.024 |
| Large                                                       |  |       |       |        |       |       | 1.096 | 0.012 | <0.001 | 1.072 | 1.120 | 1.030 | 0.011 | 0.007  | 1.008 | 1.052 |
| <b>Wealth status (ref: Poor)</b>                            |  |       |       |        |       |       |       |       |        |       |       |       |       |        |       |       |
| Middle                                                      |  |       |       |        |       |       | 1.028 | 0.009 | 0.002  | 1.010 | 1.046 | 1.018 | 0.009 | 0.033  | 1.002 | 1.036 |
| Rich                                                        |  |       |       |        |       |       | 0.951 | 0.009 | <0.001 | 0.933 | 0.970 | 0.963 | 0.010 | <0.001 | 0.944 | 0.982 |
| <b>Source of drinking water (ref: Unimproved)</b>           |  |       |       |        |       |       |       |       |        |       |       |       |       |        |       |       |
| Improved                                                    |  |       |       |        |       |       | 0.987 | 0.008 | 0.113  | 0.972 | 1.003 | 1.025 | 0.008 | 0.002  | 1.009 | 1.041 |
| <b>Type of toilet facility (ref: Unimproved)</b>            |  |       |       |        |       |       |       |       |        |       |       |       |       |        |       |       |
| Improved                                                    |  |       |       |        |       |       | 0.955 | 0.007 | <0.001 | 0.941 | 0.970 | 0.975 | 0.007 | 0.001  | 0.961 | 0.990 |
| <b>Country (ref: Angola)</b>                                |  |       |       |        |       |       |       |       |        |       |       |       |       |        |       |       |
| Benin                                                       |  |       |       |        |       |       |       |       |        |       |       | 1.033 | 0.013 | 0.011  | 1.008 | 1.059 |
| Burkina Faso                                                |  |       |       |        |       |       |       |       |        |       |       | 0.798 | 0.012 | <0.001 | 0.775 | 0.822 |
| Burundi                                                     |  |       |       |        |       |       |       |       |        |       |       | 0.752 | 0.012 | <0.001 | 0.729 | 0.776 |
| Cameroon                                                    |  |       |       |        |       |       |       |       |        |       |       | 0.735 | 0.016 | <0.001 | 0.705 | 0.767 |
| Congo                                                       |  |       |       |        |       |       |       |       |        |       |       | 0.879 | 0.016 | <0.001 | 0.848 | 0.910 |
| Cote D'Ivoire                                               |  |       |       |        |       |       |       |       |        |       |       | 0.880 | 0.018 | <0.001 | 0.846 | 0.916 |
| DR Congo                                                    |  |       |       |        |       |       |       |       |        |       |       | 0.776 | 0.016 | <0.001 | 0.746 | 0.808 |
| Ethiopia                                                    |  |       |       |        |       |       |       |       |        |       |       | 0.527 | 0.025 | <0.001 | 0.479 | 0.579 |
| Gabon                                                       |  |       |       |        |       |       |       |       |        |       |       | 0.932 | 0.018 | <0.001 | 0.897 | 0.968 |
| Gambia                                                      |  |       |       |        |       |       |       |       |        |       |       | 0.945 | 0.019 | 0.005  | 0.908 | 0.983 |

1  
2  
3  
4  
5  
6  
7  
8  
9  
10  
11  
12  
13  
14  
15  
16  
17  
18  
19  
20  
21  
22  
23  
24  
25  
26  
27  
28  
29  
30  
31  
32  
33  
34  
35  
36  
37  
38  
39  
40  
41  
42  
43  
44  
45  
46  
47

|              |       |       |        |       |       |
|--------------|-------|-------|--------|-------|-------|
| Ghana        | 0.771 | 0.021 | <0.001 | 0.731 | 0.812 |
| Guinea       | 0.769 | 0.018 | <0.001 | 0.735 | 0.805 |
| Lesotho      | 0.574 | 0.027 | <0.001 | 0.524 | 0.629 |
| Malawi       | 0.616 | 0.015 | <0.001 | 0.588 | 0.645 |
| Mali         | 0.905 | 0.017 | <0.001 | 0.873 | 0.938 |
| Namibia      | 0.390 | 0.020 | <0.001 | 0.353 | 0.430 |
| Niger        | 0.736 | 0.023 | <0.001 | 0.693 | 0.781 |
| Nigeria      | 0.950 | 0.016 | 0.002  | 0.920 | 0.982 |
| Rwanda       | 0.398 | 0.014 | <0.001 | 0.372 | 0.425 |
| Sierra Leone | 0.779 | 0.017 | <0.001 | 0.746 | 0.812 |
| Senegal      | 0.834 | 0.015 | <0.001 | 0.805 | 0.865 |
| Tanzania     | 0.820 | 0.013 | <0.001 | 0.795 | 0.845 |
| Togo         | 0.791 | 0.018 | <0.001 | 0.757 | 0.826 |
| Uganda       | 0.612 | 0.016 | <0.001 | 0.582 | 0.644 |
| Zambia       | 0.550 | 0.011 | <0.001 | 0.528 | 0.572 |
| Zimbabwe     | 0.535 | 0.014 | <0.001 | 0.509 | 0.562 |
| South Africa | 0.569 | 0.030 | <0.001 | 0.514 | 0.630 |

For peer review only

**Table S1: STROBE 2007 (v4) Statement—Checklist of items that should be included in reports of *cross-sectional studies***

| Section/Topic            | Item # | Recommendation                                                                                                                                                                       | Reported on page # |
|--------------------------|--------|--------------------------------------------------------------------------------------------------------------------------------------------------------------------------------------|--------------------|
| Title and abstract       | 1      | (a) Indicate the study's design with a commonly used term in the title or the abstract                                                                                               | Page 1             |
|                          |        | (b) Provide in the abstract an informative and balanced summary of what was done and what was found                                                                                  | Page 2             |
| <b>Introduction</b>      |        |                                                                                                                                                                                      |                    |
| Background/rationale     | 2      | Explain the scientific background and rationale for the investigation being reported                                                                                                 | Page 4-5           |
| Objectives               | 3      | State specific objectives, including any prespecified hypotheses                                                                                                                     | Page 5             |
| <b>Methods</b>           |        |                                                                                                                                                                                      |                    |
| Study design             | 4      | Present key elements of study design early in the paper                                                                                                                              | Page 5             |
| Setting                  | 5      | Describe the setting, locations, and relevant dates, including periods of recruitment, exposure, follow-up, and data collection                                                      | Page 5             |
| Participants             | 6      | (a) Give the eligibility criteria, and the sources and methods of selection of participants                                                                                          | Page 5             |
| Variables                | 7      | Clearly define all outcomes, exposures, predictors, potential confounders, and effect modifiers. Give diagnostic criteria, if applicable                                             | Page 6             |
| Data sources/measurement | 8*     | For each variable of interest, give sources of data and details of methods of assessment (measurement). Describe comparability of assessment methods if there is more than one group | N/A                |
| Bias                     | 9      | Describe any efforts to address potential sources of bias                                                                                                                            | Page 7-8           |
| Study size               | 10     | Explain how the study size was arrived at                                                                                                                                            | Page 5             |
| Quantitative variables   | 11     | Explain how quantitative variables were handled in the analyses. If applicable, describe which groupings were chosen and why                                                         | Page 6-7           |
| Statistical methods      | 12     | (a) Describe all statistical methods, including those used to control for confounding                                                                                                | Page 7-8           |
|                          |        | (b) Describe any methods used to examine subgroups and interaction                                                                                                                   | Page 7-8           |
|                          |        | (c) Explain how missing data were addressed                                                                                                                                          | Page 5             |

|                          |     |                                                                                                                                                                                                              |             |
|--------------------------|-----|--------------------------------------------------------------------------------------------------------------------------------------------------------------------------------------------------------------|-------------|
|                          |     | (d) If applicable, describe analytical methods taking account of sampling strategy                                                                                                                           | Page 5      |
|                          |     | (e) Describe any sensitivity analyses                                                                                                                                                                        | N/A         |
| <b>Results</b>           |     |                                                                                                                                                                                                              |             |
| Participants             | 13* | (a) Report numbers of individuals at each stage of study—eg numbers potentially eligible, examined for eligibility, confirmed eligible, included in the study, completing follow-up, and analysed            | N/A         |
|                          |     | (b) Give reasons for non-participation at each stage                                                                                                                                                         | N/A         |
|                          |     | (c) Consider use of a flow diagram                                                                                                                                                                           | N/A         |
| Descriptive data         | 14* | (a) Give characteristics of study participants (eg demographic, clinical, social) and information on exposures and potential confounders                                                                     | 9-10        |
|                          |     | (b) Indicate number of participants with missing data for each variable of interest                                                                                                                          | N/A         |
| Outcome data             | 15* | Report numbers of outcome events or summary measures                                                                                                                                                         | N/A         |
| Main results             | 16  | (a) Give unadjusted estimates and, if applicable, confounder-adjusted estimates and their precision (eg, 95% confidence interval). Make clear which confounders were adjusted for and why they were included | Page 10-11  |
|                          |     | (b) Report category boundaries when continuous variables were categorized                                                                                                                                    | N/A         |
|                          |     | (c) If relevant, consider translating estimates of relative risk into absolute risk for a meaningful time period                                                                                             | N/A         |
| Other analyses           | 17  | Report other analyses done—eg analyses of subgroups and interactions, and sensitivity analyses                                                                                                               | N/A         |
| <b>Discussion</b>        |     |                                                                                                                                                                                                              |             |
| Key results              | 18  | Summarise key results with reference to study objectives                                                                                                                                                     | Page 11-122 |
| Limitations              | 19  | Discuss limitations of the study, taking into account sources of potential bias or imprecision. Discuss both direction and magnitude of any potential bias                                                   | Page 1      |
| Interpretation           | 20  | Give a cautious overall interpretation of results considering objectives, limitations, multiplicity of analyses, results from similar studies, and other relevant evidence                                   | Page 1      |
| Generalisability         | 21  | Discuss the generalisability (external validity) of the study results                                                                                                                                        | Page 1      |
| <b>Other information</b> |     |                                                                                                                                                                                                              |             |

|         |    |                                                                                                                                                               |     |
|---------|----|---------------------------------------------------------------------------------------------------------------------------------------------------------------|-----|
| Funding | 22 | Give the source of funding and the role of the funders for the present study and, if applicable, for the original study on which the present article is based | N/A |
|---------|----|---------------------------------------------------------------------------------------------------------------------------------------------------------------|-----|

\*Give information separately for cases and controls in case-control studies and, if applicable, for exposed and unexposed groups in cohort and cross-sectional studies.

**Note:** An Explanation and Elaboration article discusses each checklist item and gives methodological background and published examples of transparent reporting. The STROBE checklist is best used in conjunction with this article (freely available on the Web sites of PLoS Medicine at <http://www.plosmedicine.org/>, Annals of Internal Medicine at <http://www.annals.org/>, and Epidemiology at <http://www.epidem.com/>). Information on the STROBE Initiative is available at [www.strobe-statement.org](http://www.strobe-statement.org).



**Supplementary file 1.** Multicollinearity diagnosis

| Variable                         | VIF(Mean=1.43) | Tolerance | R-Squared |
|----------------------------------|----------------|-----------|-----------|
| Anaemis Status                   | 1.04           | 0.9658    | 0.0342    |
| Cooking fuel Urbanicity          | 1.15           | 0.871     | 0.129     |
| Birth weight                     | 1.01           | 0.991     | 0.0089    |
| Sex of child                     | 1.00           | 0.997     | 0.0025    |
| Current age of child             | 1.08           | 0.926     | 0.074     |
| Age of mother                    | 2.39           | 0.4181    | 0.5819    |
| Sex of household head            | 1.03           | 0.9747    | 0.0253    |
| Age of household head            | 1.35           | 0.742     | 0.258     |
| Educational attainment of mother | 1.30           | 0.7668    | 0.2332    |
| Birth order number               | 2.52           | 0.3971    | 0.6029    |
| Household size                   | 1.40           | 0.713     | 0.2862    |
| Wealth status                    | 1.61           | 0.6196    | 0.3804    |
| Urbanicity Wealth                | 1.40           | 1.18      | 0.2867    |
| Source of drinking water         | 1.16           | 0.864     | 0.1354    |
| Type of toilet facility          | 1.34           | 0.7467    | 0.2533    |
| Country                          | 1.11           | 0.8983    | 0.2533    |
| Geographical region              | 1.35           | 0.7386    | 0.2614    |

# BMJ Open

## Household cooking fuel type and childhood anaemia in Sub-Saharan Africa: analysis of cross-sectional surveys of 123,186 children from 29 countries

|                                 |                                                                                                                                                                                                                                                                                                                                                                                                                                                                                                                             |
|---------------------------------|-----------------------------------------------------------------------------------------------------------------------------------------------------------------------------------------------------------------------------------------------------------------------------------------------------------------------------------------------------------------------------------------------------------------------------------------------------------------------------------------------------------------------------|
| Journal:                        | <i>BMJ Open</i>                                                                                                                                                                                                                                                                                                                                                                                                                                                                                                             |
| Manuscript ID                   | bmjopen-2021-048724.R1                                                                                                                                                                                                                                                                                                                                                                                                                                                                                                      |
| Article Type:                   | Original research                                                                                                                                                                                                                                                                                                                                                                                                                                                                                                           |
| Date Submitted by the Author:   | 20-May-2021                                                                                                                                                                                                                                                                                                                                                                                                                                                                                                                 |
| Complete List of Authors:       | Amadu, Iddrisu; University of Cape Coast, Department of Fisheries and Aquatic Sciences; University of Cape Coast, Department of Fisheries and Aquatic Sciences<br>Seidu, Abdul-Aziz; University of Cape Coast, Department of Population and Health; James Cook University, Department of Population and Health<br>Afitiri, Abdul-Rahaman; University of Cape Coast, Department of Environmental Science<br>Ahinkorah, Bright; University of Technology Sydney<br>Yaya, Sanni; University of Ottawa; Imperial College London |
| <b>Primary Subject Heading</b>: | Epidemiology                                                                                                                                                                                                                                                                                                                                                                                                                                                                                                                |
| Secondary Subject Heading:      | Public health                                                                                                                                                                                                                                                                                                                                                                                                                                                                                                               |
| Keywords:                       | Anaemia < HAEMATOLOGY, PUBLIC HEALTH, Community child health < PAEDIATRICS                                                                                                                                                                                                                                                                                                                                                                                                                                                  |
|                                 |                                                                                                                                                                                                                                                                                                                                                                                                                                                                                                                             |

SCHOLARONE™  
Manuscripts



I, the Submitting Author has the right to grant and does grant on behalf of all authors of the Work (as defined in the below author licence), an exclusive licence and/or a non-exclusive licence for contributions from authors who are: i) UK Crown employees; ii) where BMJ has agreed a CC-BY licence shall apply, and/or iii) in accordance with the terms applicable for US Federal Government officers or employees acting as part of their official duties; on a worldwide, perpetual, irrevocable, royalty-free basis to BMJ Publishing Group Ltd ("BMJ") its licensees and where the relevant Journal is co-owned by BMJ to the co-owners of the Journal, to publish the Work in this journal and any other BMJ products and to exploit all rights, as set out in our [licence](#).

The Submitting Author accepts and understands that any supply made under these terms is made by BMJ to the Submitting Author unless you are acting as an employee on behalf of your employer or a postgraduate student of an affiliated institution which is paying any applicable article publishing charge ("APC") for Open Access articles. Where the Submitting Author wishes to make the Work available on an Open Access basis (and intends to pay the relevant APC), the terms of reuse of such Open Access shall be governed by a Creative Commons licence – details of these licences and which [Creative Commons](#) licence will apply to this Work are set out in our licence referred to above.

Other than as permitted in any relevant BMJ Author's Self Archiving Policies, I confirm this Work has not been accepted for publication elsewhere, is not being considered for publication elsewhere and does not duplicate material already published. I confirm all authors consent to publication of this Work and authorise the granting of this licence.

## Household cooking fuel type and childhood anaemia in Sub-Saharan Africa: analysis of cross-sectional surveys of 123,186 children from 29 countries

Iddrisu Amadu<sup>1,2,3</sup>, Abdul-Aziz Seidu<sup>4,5,6†</sup>, Abdul-Rahaman Afitiri<sup>3</sup>, Bright Opoku Ahinkorah<sup>7</sup>, Sanni Yaya<sup>8,9</sup>

1. Africa Centre of Excellence in Coastal Resilience, University of Cape Coast, Cape Coast, Ghana
2. Department of Fisheries and Aquatic Sciences, School of Biological Sciences, College of Agriculture and Natural Sciences, University of Cape Coast, Ghana
3. Department of Environmental Science, School of Biological Sciences, College of Agriculture and Natural Sciences, University of Cape Coast, Ghana
4. Department of Population and Health, University of Cape Coast, Cape Coast, Ghana
5. College of Public Health, Medical and Veterinary Sciences, James Cook University, Townsville, Queensland, Australia
6. Department of Estate Management, Takoradi Technical University, Takoradi, Ghana
7. The Australian Centre for Public and Population Health Research (ACPPHR), Faculty of Health, University of Technology Sydney, Australia
8. School of International Development and Global Studies, University of Ottawa, Ottawa, Canada
9. The George Institute for Global Health, Imperial College London, London United Kingdom

**†Correspondence to:** Mr. Abdul-Aziz Seidu, Department of Population and Health, Faculty of Social Sciences, College of Humanities and Legal Studies, University of Cape Coast, Cape Coast, Ghana, PMB ; E-mail:[abdul-aziz.seidu@stu.ucc.edu.gh](mailto:abdul-aziz.seidu@stu.ucc.edu.gh); Tel.: +233244291198

IA: [iddrisu.amadu@stu.ucc.edu.gh](mailto:iddrisu.amadu@stu.ucc.edu.gh)

†AS: [abdul-aziz.seidu@stu.ucc.edu.gh](mailto:abdul-aziz.seidu@stu.ucc.edu.gh)

ARA: [abdul-rahaman.afitiri@stu.ucc.edu.gh](mailto:abdul-rahaman.afitiri@stu.ucc.edu.gh)

BOA: [brightahinkorah@gmail.com](mailto:brightahinkorah@gmail.com)

SY: [hsanniya@uottawa.ca](mailto:hsanniya@uottawa.ca)

## Abstract

**Objective:** This study sought to investigate the joint effect of household cooking fuel type and urbanicity (rural-urban residency) on anaemia among children under the age of 5 in sub-Saharan Africa.

**Design:** We analysed cross-sectional data of 123,186 children under the age of 5 from 29 sub-Saharan African countries gathered between 2010 and 2019 by the Demographic and Health Survey (DHS) Program. Bivariate (chi-square test of independence) and multilevel logistic regression were used to examine the effect of urbanicity-household cooking fuel type on child anaemia. Results were reported as adjusted odds ratios (aORs) with 95% confidence intervals (CIs) at  $p < 0.05$ .

**Outcome measures:** Anaemia status

**Results:** The percentage of children who suffered anaemia was 64%. The percentage of children who suffered anaemia was high in children born to mothers in Western Africa (75%) and low among those born in Southern Africa (54%). Children from rural households that depend on unclean cooking fuels [aOR=1.120; 95% CI=1.033-1.214] and rural households that depend on clean cooking fuels [aOR=1.256; 95% CI=1.080-1.460] were more likely to be anaemic as compared to children from urban households using clean cooking fuel. Child age, sex of child, birth order, perceived birth size, age of mother, BMI of mother, education, marital status, employment status, antenatal care, wealth, household size, access to electricity, type of toilet facility, source of drinking water, and geographic region had significant associations with anaemia status.

**Conclusions:** Our study established an association between the joint effect of type of household cooking fuel and urbanicity and anaemia among children under the age of 5 in SSA. It is therefore critical to promote the usage of clean cooking fuels among households and women in rural areas. These should be done taking into consideration the significant child, maternal, household, and contextual factors identified in this study.

**Keywords:** Anaemia; Under-five Children; Sub-Saharan Africa; DHS; Public Health

### Strengths and limitations

- The major strength of this study is the use of recent nationally representative surveys, with relatively large sample sizes. This makes the findings generalisable to all under-five children in the countries we included in our study.
- Also, we employed rigorous statistical modelling to assess the association between the type of cooking fuel and anaemia while controlling for theoretical and practical confounders.
- The study, however, is limited by the cross-sectional nature of the design employed for the data collection. Due to this, it is impossible to detect temporality of sequence.
- Considering that several proximal, intermediate and distal factors could moderate the effects of household cooking fuel type and urbanicity on child anaemia, we acknowledge that those considered in this study are not exhaustive. Based on data availability, practical relevance and parsimony, the variables included in this study were chosen.

## INTRODUCTION

In low and middle-income countries, anaemia remains a major public health problem which causes childhood mortality and morbidity<sup>1</sup>. Anaemia is a condition in which the haemoglobin level is lower than the body's required amount for physiological activities<sup>2</sup>. According to<sup>3</sup> about 273.2 million children suffer from anaemia globally with a general prevalence of 42.6%. However, its effects are disproportionate across regions, with sub-Saharan Africa (SSA) being one of the most affected with a startling prevalence rate of 62.3%<sup>4</sup>.

Anaemia is a major contributor to some of the serious adverse health conditions in children and affects their cognitive, behavioural and physical development<sup>3,5-7</sup>. The notable causes of anaemia in children are multifactorial and include deficiency of iron, and other micronutrients such as folate, vitamin B12 and vitamin A; malaria, HIV and chronic disease such as sickle cell disease<sup>8</sup>.

Apart from these causes, a major environmental cause of anaemia is indoor air pollution as a result of biomass fuel use in cooking in households<sup>9</sup>. Household biomass fuel is a global air pollution issue that harms human health, the climate, and the environment. About three billion people use biomass fuels such as plant residues, animal dung, wood, and charcoal for daily domestic use<sup>10</sup>. Inefficient combustion of these fuels could release harmful gases such as sulfur dioxide (SO<sub>2</sub>), carbon monoxide (CO) and nitrogen dioxide (NO<sub>2</sub>), and Particulate Matter (PM)<sup>11,12</sup>. According to<sup>13</sup>, households that use biomass fuels are often exposed to peak indoor particulate matter (PM<sub>10</sub>) levels greater than the air quality guidelines. The mechanism by which biomass fuels use could contribute to childhood anaemia are unknown. But it has been postulated by Accinelli et al.<sup>14</sup> that biomass fuel exposure causes lung inflammation with elevated levels of IL-6, which produces in the liver hepcidin, a negative regulator of iron stores. However, studies have shown that biomass fuel expels high carbon monoxide levels which bind with haemoglobin, form carboxyhaemoglobin and reduce the level of haemoglobin in the blood, which could lead to functional anaemia, with an adequate Hb level. For instance, studies in India<sup>9</sup> and Swaziland<sup>11</sup> found the prevalence of anaemia to be significantly high among children in households that rely on biomass fuels for cooking.

Apart from anaemia, evidence of other adverse health outcomes spanning respiratory illnesses, cancer, and eye problems from indoor air pollution due to inefficient burning of biomass fuels for cooking in poorly ventilated settings exist<sup>15-17</sup>. A majority of the burden is suffered by women who by custom are responsible for cooking and other household chores, and their children, especially, those below the age of 5<sup>17,18</sup>. The prevalence of the burden is relatively low in urban areas where clean fuels like liquid petroleum gas or natural gas and electricity are typically used. However, most rural residents mainly depend on biomass fuels<sup>19</sup>. These fuels include among others wood, animal dung, twigs, and dry leaves, and crop residues such as straw and rice husks<sup>20</sup>. The high burden of adverse health outcomes among rural residents is that most of them often depend on unclean cooking fuels<sup>16,21,22</sup>.

1  
2  
3 The associations between household biomass fuel use in cooking and important health  
4 variables of women and children such as adverse pregnancy outcomes (low birth weight,  
5 stillbirth) <sup>15,23</sup> women health (BMI, anaemia) <sup>15,24</sup>, and the health of children under 5 years of  
6 age (child weight, child anaemia) [16, 23] have been explored. Few studies have explored the  
7 association between household biomass fuel use, a notable source of indoor air pollution in  
8 LMICs with child anaemia in SSA. Further, critical to our understanding but absent in such sub-  
9 regional analysis by studies is the joint impact of household biomass fuel use and urbanicity  
10 on child anaemia in SSA. This study, therefore, seeks to investigate the joint effect of  
11 household biomass fuel use for cooking and urbanicity on anaemia among children under the  
12 age of 5 in SSA.  
13  
14  
15  
16

## 17 **METHODS**

### 18 **Data and sampling**

19 Nationally representative data from the Demographic and Health Surveys (DHS) Program for  
20 SSA countries from 2010 to 2019 were acquired for analysis in this study. The DHS Program  
21 provides large secondary data gathered from surveys using probability sampling methods,  
22 following standard protocols that are internationally accepted. Different sets of  
23 questionnaires designed and pre-tested to ensure reliability and amenability for comparison  
24 of data gathered on various spatial and temporal scales are used in the survey. Some  
25 questionnaires the program uses include the "Children's questionnaire" "Mother's  
26 questionnaire", "Men's questionnaire" and "Household questionnaire". These questionnaires  
27 cover a broad range of variables cutting across demographics and anthropometrics, water  
28 and sanitation, health, wealth, nutrition among others. The program recruits and trains field  
29 officers to collect accurate data and measurement of weight, height, anaemia using  
30 recommended guidelines and instruments. Data on other important variables such as  
31 household cooking fuel, urbanicity, wealth, water, and sanitation are taken at the household  
32 level. The dataset used in this study are: Children's Data - Children's Recode, and Household  
33 Data - Household Recode (variable names: caseid; v000; v001 v007; v013; v102; v113; v116; v136;  
34 v149; v151; v152; v190; bord; b4; b8; m19; hw2; v457; v005; hhid; hv001, hv000; hv226).  
35  
36  
37  
38  
39  
40  
41

### 42 **Study Countries**

43 A sample of 123,182 was drawn from 29 countries (Figure 1) across the five (5) geographic  
44 regions—Western, Eastern, Central and Southern Africa in SSA. For a country to be selected,  
45 it must meet the following criteria: should be found in SSA based on the United Nations  
46 regional groupings; it must have a DHS dataset with standardized questions and observations  
47 on anaemia level of children under five years as well as household cooking fuel type,  
48 urbanicity, source of drinking water and type of toilet facility. Where multiple datasets exist  
49 for a country, the most recent dataset is used.  
50  
51  
52  
53  
54

55 \*\*\*Figure 1\*\*\*  
56  
57  
58  
59



\*\*\*Table 1\*\*\*

### Definition of important variables

The dataset provided information on household cooking fuel type, source of drinking water and toilet facility type at the household level. The observations for household cooking fuel were classified into "Clean" and "Unclean" (polluting fuels) following the criterion some studies<sup>25,26</sup> used (see Table 1). The weight of the child at birth named as "Birth weight" was categorized as "Underweight" (<2.5kg) and "Normal" (≥2.5kg) (see,<sup>27</sup>). Also, the observations for the household source of drinking water and type of toilet facility were classified into "improved" and "unimproved" using the revised definitions by the WHO/UNICEF Joint Monitoring Programme (JMP) report<sup>28</sup>. Table 2 summarises the descriptions of improved and unimproved sources of water and toilet facilities (see<sup>29</sup>) for explication of the categorisation of these critical basic services.

\*\*\*Table 2\*\*\*

### Measures

#### Outcome variable

Anaemia status of children is the outcome variable considered in this study. According to DHS, the anaemia status of living children within the age bracket 0-4 years before the survey night was taken. It has its responses classified into four (4) categories according to the WHO recommendation as (i) "Not anaemic" for children with haemoglobin count(g/dl) measuring above 11g/dl; (ii) "Mild anaemia" for haemoglobin count of 10-10.9g/dl; (iii) "Moderate anaemia" for haemoglobin count between 7.0-9.9g/dl; and (iv) "Severe anaemia" for haemoglobin count less than 7.0g/dl. Children with no observations for anaemia count (not tested) and those whose mothers were not listed in the household questionnaire were excluded. Observations under mild, moderate and severe were combined and recoded as "1" for "Anaemic" and observations under not anaemic was recoded as "0" "Normal" (see<sup>30</sup>. This produced the dichotomous outcome variable "Aneamia status".

#### Main predictor variable

The predictor chosen for this study is a composite variable formed from the interactive effect of household cooking fuel type and urbanicity. The selection of the predictor variable was based on parsimony, literature review, theoretical relevance as well as practical significance. Household cooking fuel type and Urbanicity both had two categories since the former was classified as "Clean" and "Unclean" and the latter measured as "Rural" and "Urban" per the Demographic Health Survey (DHS). This, therefore, gave four mutually exclusive groups:

1  
2  
3 Unclean-Urban (households relying on "unclean" cooking fuel and found in urban areas);  
4 Unclean-Rural (households relying on "unclean" cooking fuel and found in rural areas);  
5 Clean=Urban (households using "clean" cooking fuels and found in urban areas); and Clean-  
6 Rural (households using "clean" cooking fuels and found in rural areas). This variable  
7 combination technique has been widely applied in previous studies <sup>29,31</sup>. Out of the four  
8 responses, "Unclean-Urban" was chosen as the reference category in the models. The choice  
9 of the reference category was based guided by previous studies <sup>32,33</sup>. These authors explained  
10 that urban areas are considered as places with relatively higher levels of air pollution and its  
11 associated negative health outcomes, which has the potential of multiplied burden relative to  
12 child anaemia when households use unclean cooking fuels. This makes it prudent to use  
13 "Unclean Urban" as the reference category.  
14  
15  
16  
17

### 18 Covariates

19 There is a plethora of evidence on the independent associations between the type of  
20 household cooking fuel and urbanicity with child anaemia <sup>14,22,33-35</sup>. Even though the UNICEF  
21 categorisation of the factors that influence the association between household cooking fuel  
22 and child anaemia—proximal, immediate and distal factors serves as a useful framework, for  
23 parsimony, practical and theoretical considerations we categorize independent variables  
24 drawn from literature under 'Individual-level characteristics', "Household characteristics"  
25 and "Contextual factors" (see <sup>4,36</sup>. The Individual-level characteristics considered in this study  
26 are Child age in years (0, 1, 2, 3 and 4); Sex of child (Male, Female); Birth order (1, 2, 3 and  
27 above); Perceived birth size (Larger than average, Average, Smaller than average, Don't  
28 know); Birth weight (Underweight, Normal); Age of the mother (15-19, 20-24, 25-29, 30-34, 35-  
29 39, 40-44, 45-49); BMI of the mother (Thin, normal and Obese); Education (No formal,  
30 Primary, Secondary and Tertiary); Marital status (Never married, Married, Living with a  
31 partner, widowed/divorced/separated); Employment status (No, Yes); Number of antenatal  
32 visits by mother "ANC" (No, Yes); Number of postnatal visits by mother "PNC" (No, Yes)  
33  
34  
35  
36  
37  
38

39 The relevant household-level included in this study are Wealth status (Poor, Middle, Rich);  
40 Household size ("Small" for those with 1-5 members; "Medium" 5-10 member, and "Large"  
41 for more than 10 members); Age of household head ("Young-aged adults" for those age  
42 below 35; "Middle-aged adults" for those between 35 to 64years; and "Old-aged adults" for  
43 those 65years and above); Sex of household head (Male, Female); Access to electricity (No,  
44 Yes); Type of toilet facility (Improved, Unimproved); Source of drinking water (Improved,  
45 Unimproved)  
46  
47

48 Finally, we adjusted for the effect of the Contextual factor "Geographic region" (Western  
49 Africa, Eastern Africa, Central Africa, Southern Africa). Variables in this category of factors  
50 relate to the attributes of respondent's neighbourhood, and opportunities and services that  
51 are space-bound <sup>37,38</sup>.  
52  
53  
54  
55  
56  
57  
58  
59  
60

## Data Analysis

The Stata version 14.0 MP (Stata Corporation, College Station, TX, USA) software was used for the analysis of data. The data was first declared as a survey dataset to prevent potential errors that could arise from the complex survey design using the “svyset” command with the cluster, weighting, and strata variables. To understand the distribution of childhood anaemia and the influence of predictive factors on anaemia, descriptive analysis was performed. Using ArcGIS 10.6, the data was integrated with ESRI Shapefiles to construct a map of the study countries showing the distribution of child anaemia. We then determined the associations between the anaemia status of children under five and the relevant predictors using the chi-square test of independence. These relationships were further examined by implementing five multilevel logistic regression models. The first model (Model 0) with no independent variable indicated the variance in child anaemia as a result of clustering of the primary sampling units (PSU). In Model I, only the main predictor variable (Urbanicity-Type of cooking fuel). Model II adjusted for the individual-level characteristics. The effects of both individual-level and the relevant household-level factors were adjusted in Model III. Model IV controlled the individual-level and household-level characteristics, and the contextual-level factors. The Akaike’s Information Criterion (AIC) was the model comparison metric estimated. Results were present using odds ratios (OR) and adjusted odds ratios (aORs) at  $p < 0.05$  and 95% Confidence Intervals (CI).

## Ethical considerations

We used datasets provided by the Demographic Health Surveys Program and have not had any form of contact with the study participants. The program obtains approval from the Ethics Boards of the various partner organisations and countries such as the Ministries of Health. The DHS Program recognizes and adheres to established international and local ethical standards and protocols in its surveys. The ICF International’s Institutional Review Board (IRB) through The DHS Program’s reviewed and approved all survey procedures and instruments used before implementation. The board aside from providing technical assistance to the program ensures that the survey complies with the United States Department of Health and Human Services regulations for the protection of human subjects CFR 46 as well as the laws of the individual countries. Further information regarding the DHS data usage and ethical standards can be accessed at <https://dhsprogram.com/data/Access-Instructions.cfm>.

## Patient and public involvement

Patients and the public were not involved in the design and conduct of this research.

## RESULTS

\*\*\*Figure 2\*\*\*

### Descriptive analysis

The study included 123,182 children under the age of 5 years from 29 SSA countries. The percentage of children who suffered anaemia was 64%. The prevalence of anaemia was high in children born to mothers in Western Africa (75%) and low among those born in Southern Africa (54%) (Figure 2). A majority (68%) of the children included in the survey were in rural households that used unclean cooking fuels, 24% were aged 1, 51% were male, 48% were of second birth order, and 50% were average size at birth. Most of the children included in the survey were born to mothers aged 25-29 (27%), mothers with normal BMI (67%), mothers with no formal education (40%), married mothers (72%), employed mothers (64%), mothers who attended ANC (91%) and mothers who did not attend PNC (56%). A majority of the children belonged to poor households (45%), households with medium size (46%), households with Middle-aged adults heads (44%), households with male heads (81%), households with no access to electricity (70%), households with an unimproved toilet facility (56%), and households with improved drinking water (65%). Most of the children included in the study were in Western Africa (40%) and Eastern Africa (40%). Significant differences in the distribution of anaemia status was found in all the in predictor variables, except PNC attendance (Table 2).

\*\*\*Table 2\*\*\*

### Multivariate analysis

Table 3 shows the multilevel logistic regression results on the joint effect of urbanicity and type of household cooking fuel on childhood anaemia in SSA. In Model IV, the final model that controlled for all the variables including country, it was found that children from rural households that depend on unclean cooking fuels [aOR=1.120; 95% CI=1.033-1.214] and rural households that depend on clean cooking fuels [aOR=1.256; 95% CI=1.080-1.460] were more likely to be anaemic as compared to children from urban households using clean cooking fuel.

The odds of suffering from anaemia decreased with the age of the child. It was found that children aged 4 had the lowest odds [aOR=0.264; CI=0.247-0.283] of suffering from anaemia compared with those less than 1 year (0). Female children were less likely to be anaemic compared to male children [aOR=0.857; CI=0.829-0.887]. Children with three or more birth order were more likely to be anaemic compared to first birth order children [aOR=1.269; CI=1.179-1.367]. Children with smaller than average birth size were more likely to be anaemic compared to those who were larger than average [aOR=1.075; CI=1.020-1.132].

The odds of anaemia in children under five was lower among those born to mothers aged 45-49 compared to those aged 15-19 [aOR=0.559; CI=0.484-0.645]. Children born to mothers with

1  
2  
3 normal BMI were less likely to be anaemic compared to born to children with thin mothers  
4 [aOR=0.923; CI=0.870-0.979]. Children born to mothers with tertiary educational level were  
5 less likely to be anaemic compared to those whose mothers had no formal education  
6 [aOR=0.534; CI=0.480-0.595]. Children born to widowed/divorced/separated mothers were  
7 more likely to be anaemic compared to those who were never married [aOR=1.102; CI=1.003-  
8 1.211]. Children born to mothers who attended ANC were less likely to be anaemic compared  
9 to those who never attended ANC [aOR=0.931; CI=0.874-0.991].  
10  
11  
12

13 The odds of anemia in children under five was lower among children born to mothers in rich  
14 households compared to those born to mothers in poor households [aOR=0.888; CI=0.844-  
15 0.935]. Children born to mothers in larger households were more likely to be anaemic  
16 compared to those born to mothers in small households [aOR=1.240; CI=1.163-1.321]. Children  
17 born to mothers in households with access to electricity were less likely to be anaemic  
18 compared to those born to mothers in household without access to electricity [aOR=0.896;  
19 CI=0.853-0.941]. Children born to mothers who lived in households with improved source of  
20 drinking water were less likely to be anaemic compared to those born to mothers who lived  
21 in households with unimproved source of drinking water [aOR=1.046; CI=1.008-1.086].  
22 Compared to children born to mothers who live in Western Africa, those born to mothers who  
23 live in Southern Africa were less likely to be anaemic [aOR=0.497; CI=0.451-0.548] (see Table  
24 3).  
25  
26  
27  
28  
29  
30  
31

32 \*\*\*Table 3\*\*\*  
33

## 34 DISCUSSION

35 In this current study, our principal aim was to investigate the association between household  
36 biomass fuel use, and the joint effect of household biomass fuel use for cooking and urbanicity  
37 on anaemia among children under the age of 5 in SSA. The study showed that children from  
38 rural households that depend on unclean cooking fuels were more likely to be anaemic  
39 compared with children from urban households using unclean cooking fuel. This is in line with  
40 previous studies in various parts of the world such as Timor-Lest<sup>21</sup> and India<sup>16,22</sup>. Although this  
41 study was a cross-sectional study and could not claim causality, some studies<sup>16</sup> have explained  
42 that exposure to unclean cooking fuels may lead to systemic inflammation which is regarded  
43 as a popular cause of anaemia, mediated by inflammatory cytokines such as tumour necrosis  
44 factor-alpha (TNF- $\alpha$ ), interleukin-1 (IL-1), interleukin-6 (IL-6), and interferon- $\gamma$  (IFN- $\gamma$ )<sup>16,39</sup>. The  
45 pathways by which these causes anaemia is that IL-6 increases with alveolus inflammation related  
46 to biomass pollution and hepcidin goes down, that stop the movement of Fe, causing anemia by  
47 inflammation<sup>16,39</sup>. Apart from the key independent variable, we controlled for other key factors  
48 associated with anaemia among children under five which are worth discussing in light of  
49 previous evidence.  
50  
51  
52  
53  
54  
55  
56  
57  
58  
59  
60



1  
2  
3 We found that the birth weight of the child had a statistically significant association with  
4 anaemia. Specifically, children with normal weight had lower odds of being anaemic  
5 compared with underweight children. This aligns with previous studies in Ethiopia<sup>40</sup> and Brazil  
6<sup>41</sup>. Some previous studies espoused that there is a direct link between food consumption and  
7 anaemia. Due to this, in a household where there is no food security, it can affect the  
8 nutritional status of children, which could contribute to anaemia<sup>42,43</sup>. Relatedly, we found  
9 that children in large households had higher odds of suffering from anaemia compared to  
10 those in a small household. This finding confirms a previous study in Ethiopia<sup>44</sup>. Insufficient  
11 consumption of appropriate quantity of nutrients due to the high numbers in the households  
12 could possibly account for this observation as explained by<sup>44</sup>.

13  
14  
15  
16  
17 The study also established that the socio-economic status (education and wealth) of women  
18 had a statistically significant association with child anaemia. Specifically, it was found that  
19 children whose mothers are in the rich wealth status, as well as those with tertiary level of  
20 education, have lower odds of being anaemic. This corroborates several previous studies in  
21 SSA and other countries such as Ethiopia<sup>40,45,46</sup>, Brazil<sup>47</sup>, Switzerland<sup>48</sup>, Burma<sup>49</sup>, and India  
22<sup>50</sup>. There are three pathways to the explanation of this finding. First, on the supply side,  
23 children from households with high-socio economic status can buy nutritious foods for their  
24 children, unlike the poor ones who might not be able to afford three square meals a day. In  
25 other words, the poor might lack the resources to purchase nutritious foods for their children.  
26 Second, evidence also suggests that mothers in poor households are also anaemic and the  
27 probability of their children also being anaemic is high. Thirdly, in terms of education, mothers  
28 who are highly educated can translate the health education they receive during child welfare  
29 clinics into practice. Besides, those who are highly educated can recognise danger signs  
30 related to childhood illnesses that warrant emergency care<sup>44,51</sup>.

31  
32  
33  
34  
35  
36 Another major finding in our study was that the odds of suffering from anaemia decreased  
37 with the age of the child. This finding is supported by other studies conducted in Ethiopia  
38<sup>40,42,52,53</sup>, Ghana<sup>54</sup>, and Uganda<sup>55</sup>. This observation is expected due to the fact that children  
39 have their least Hb value at six month and they continue increasing their values as they age<sup>56</sup>.  
40 We also observed a statistically significant association between maternal age and child's  
41 anaemia. Specifically, children whose mothers are aged 45-49 and those aged 30-34 had the  
42 lowest odds of being anaemic. This is consistent with previous studies in Ethiopia<sup>44</sup>. It is  
43 possible that as mothers advance in age, they gain experiences with childcare and also, they  
44 are more likely to be exposed to education on appropriate practices on childhood nutrition  
45 compared with those who are adolescents. In line with a previous study<sup>57</sup>, we also found that  
46 children in female-headed households, middle-aged adults, old age adults were more likely to  
47 be anaemic compared with those in male-headed households; and households headed by  
48 young adults. Surprisingly, our study showed that children in households with an improved  
49 source of drinking water had higher odds of being anaemic. This is contrary to other empirical  
50 studies in Bangladesh<sup>58</sup>, India<sup>22</sup>, Benin and Mali<sup>59</sup>. Longitudinal case-control studies coupled  
51 with qualitative evidence are needed to unravel this counter-intuitive finding.

1  
2  
3 It is worthy to discuss the methodological limitations inherent in this study. First,  
4 although we controlled for several confounders, we could only control for those that were in  
5 the dataset. Second, various contextual issues could possibly explain the results we obtained  
6 from this study, nonetheless, we used multi-level analysis to account for the contextual  
7 variations. The study is also limited by the cross-sectional nature of the design employed for  
8 the data collection. Due to this, it is impossible to detect temporality of sequence<sup>60</sup>. There is  
9 also the possibility of error in measurement of the Hb levels, however this is likely to be  
10 minimal since DHS uses standardized instruments across surveys and also uses experienced  
11 and well trained data collectors. We did not also control for the dietary pattern and nutritional  
12 intake because the data are available for only children aged 6–23 months. In addition, we did  
13 not control for child's fever, diarrhea, and Acute Respiratory Infection with anemia since there  
14 are variations in the context, year, and season of data collection across the surveys<sup>60,61</sup>.  
15  
16  
17  
18  
19

## 20 CONCLUSION

21 Our study found that there is an association between the joint effect of household biomass  
22 fuel use for cooking and urbanicity and anaemia among children under the age of 5 in SSA.  
23 Apart from this we also found that birth weight of the child, age of the child, maternal age,  
24 sex of household head, age of household head, maternal education, wealth status, size of  
25 household, type of source of drinking water and country of residence are associated with  
26 childhood anaemia. The following recommendations are therefore made for policy and  
27 practice. Firstly, it is critical to promote clean fuel usage among households and women in  
28 rural areas. This could be done by governments in various countries by enhancing access and  
29 subsidising the cost of natural and or, liquified petroleum gas [LPG] and cylinders. It is,  
30 therefore, imperative to also improve road networks which can easily lead to accessible  
31 markets. Second, it is also imperative to advocate for improvement in female education which  
32 could lead to an improvement in the socio-economic status of the women. Thirdly, there is the  
33 need for the installation of improved biomass stoves. Also, maternal education by community  
34 health nurses on the risk factors of anaemia is also strongly suggested. Stakeholders that seek  
35 to improve maternal and child health could also consider these associated factors.  
36  
37  
38  
39  
40  
41

## 42 Abbreviations

43 CI: Confidence interval

44 DHS: Demographic health survey

45 SSA: sub-Saharan Africa

46 PM: Particulate Matter

47 WHO: World Health Organization  
48  
49

50 **Twitter:** Abdul-Aziz Seidu @abdul\_aziz10\_  
51  
52  
53  
54  
55  
56  
57  
58  
59  
60

## Acknowledgements

We acknowledge the Demographic Health Surveys for providing us with the data upon which the findings of this study were based. Special thanks to Mr Eric Duku for his support in the spatial representation of child anaemia.

## Contributorship statement

IA conceptualized and designed the study. IA and AA performed the analysis. IA, AS, AA, BOA and SY drafted the initial draft. AS, AA, BOA and SY provided technical support and critically reviewed the manuscript for its intellectual content. SY had the final responsibility to submit for publication. All authors read and amended drafts of the paper and approved the final version.

**Funding:** This research received no specific grant from any funding agency in the public, commercial or not-for-profit sectors.

**Competing interest:** None

**Patient consent:** Not applicable

## Ethics approval

Ethics approval was not required for this study since the data is secondary and is available in the public domain. More details regarding DHS data and ethical standards are available at: <http://goo.gl/ny8T6X>.

**Provenance and peer review:** Not commissioned; externally peer-reviewed

## Data sharing statement

Data for this study were sourced from Demographic and Health surveys (DHS) and available here: <http://dhsprogram.com/data/available-datasets.cfm>.

## References

1. Ntenda PAM, Nkoka O, Bass P, Senghore T. Maternal anemia is a potential risk factor for anemia in children aged 6–59 months in Southern Africa: a multilevel analysis. *BMC Public Health*. 2018;18(1):650.
2. Roberts DJ, Matthews G, Snow RW, Zewotir T, Sartorius B. Investigating the spatial variation and risk factors of childhood anaemia in four sub-Saharan African countries. *BMC Public Health*. 2020;20(1):126.
3. Organization WH, others. Haemoglobin concentrations for the diagnosis of anaemia and assessment of severity. Vitamin and Mineral Nutrition Information System. 2011. Geneva. *World Heal Organ (WHO/NMH/NHD/MNM/111)* Available from <http://www.who.int/vmnis/indicators/haemoglobin.pdf> (accessed 05/10/2015). Published online 2015.
4. Nambiema A, Robert A, Yaya I. Prevalence and risk factors of anemia in children aged



- 1  
2  
3 from 6 to 59 months in Togo: analysis from Togo demographic and health survey data,  
4 2013–2014. *BMC Public Health*. 2019;19(1):215.  
5  
6  
7 5. Wintrobe MM, Lee GR, Foerster J, et al. Wintrobe's clinical hematology. Vol. 1.  
8 *Lippincott Williams Wilkins Engelmann, B Massberg, S(2013) Thromb as an Intravasc Eff*  
9 *innate immunity Nat Rev Immunol*. 2013;13:34-45.  
10  
11 6. Soliman A, Abu-Hamila N, El-Ebiary M. Assessment of Biodentine as an indirect pulp  
12 capping material in young permanent molars YR - 2014/1/1. *Indian J Endocrinol Metab*.  
13 (7 UL-[https://www.ijem.in/article.asp?issn=2230-](https://www.ijem.in/article.asp?issn=2230-8210;year=2014;volume=18;issue=7;spage=1;epage=5;aulast=Soliman;t=5)  
14 [8210;year=2014;volume=18;issue=7;spage=1;epage=5;aulast=Soliman;t=5](https://www.ijem.in/article.asp?issn=2230-8210;year=2014;volume=18;issue=7;spage=1;epage=5;aulast=Soliman;t=5)):1 OP-5 VO -  
15 18. doi:10.4103/tdj.tdj\_16\_18  
16  
17 7. Wirth JP, Rohner F, Woodruff BA, et al. Anemia, micronutrient deficiencies, and  
18 malaria in children and women in Sierra Leone prior to the Ebola outbreak-findings of  
19 a cross-sectional study. *PLoS One*. 2016;11(5):e0155031.  
20  
21 8. Organization WH, others. Global nutrition targets 2025: anaemia policy brief. Geneva:  
22 World Health Organization, 2014.  
23  
24 9. Mishra V, Retherford RD. Does biofuel smoke contribute to anaemia and stunting in  
25 early childhood? *Int J Epidemiol*. 2007;36(1):117-129.  
26  
27 10. Van Gemert F, Chavannes N, Kirenga B, et al. Socio-economic factors, gender and  
28 smoking as determinants of COPD in a low-income country of sub-Saharan Africa:  
29 FRESH AIR Uganda. *NPJ Prim care Respir Med*. 2016;26(1):1-6.  
30  
31 11. Machisa M, Wichmann J, Nyasulu PS. Biomass fuel use for household cooking in  
32 Swaziland: is there an association with anaemia and stunting in children aged 6–36  
33 months? *Trans R Soc Trop Med Hyg*. 2013;107(9):535-544.  
34  
35 12. Woolley KE, Bagambe T, Singh A, et al. Investigating the Association between Wood  
36 and Charcoal Domestic Cooking, Respiratory Symptoms and Acute Respiratory  
37 Infections among Children Aged Under 5 Years in Uganda: A Cross-Sectional Analysis  
38 of the 2016 Demographic and Health Survey. *Int J Environ Res Public Health*.  
39 2020;17(11):3974.  
40  
41 13. Organization WH, others. *WHO Air Quality Guidelines for Particulate Matter, Ozone,*  
42 *Nitrogen Dioxide and Sulfur Dioxide: Global Update 2005: Summary of Risk Assessment.;*  
43 2006.  
44  
45 14. Accinelli RA, Leon-Abarca JA. Solid fuel use is associated with anemia in children.  
46 *Environ Res*. 2017;158:431-435. doi:<https://doi.org/10.1016/j.envres.2017.06.032>  
47  
48 15. Amegah AK, Boachie J, Näyhä S, Jaakkola JJK. Association of biomass fuel use with  
49 reduced body weight of adult Ghanaian women. *J Expo Sci Environ Epidemiol*.  
50 Published online 2019:1.  
51  
52 16. Page CM, Patel A, Hibberd PL. Does smoke from biomass fuel contribute to anemia in  
53  
54  
55  
56  
57  
58  
59  
60

- pregnant women in Nagpur, India? A cross-sectional study. *PLoS One*. 2015;10(5):e0127890.
17. Kyu HH, Georgiades K, Boyle MH. Biofuel smoke and child anemia in 29 developing countries: a multilevel analysis. *Ann Epidemiol*. 2010;20(11):811-817.
  18. Desai MA, Mehta S, Smith KR, Organization WH, others. *Indoor Smoke from Solid Fuels: Assessing the Environmental Burden of Disease at National and Local Levels*. World Health Organization; 2004.
  19. Begum BA, Paul SK, Hossain MD, Biswas SK, Hopke PK. Indoor air pollution from particulate matter emissions in different households in rural areas of Bangladesh. *Build Environ*. 2009;44(5):898-903.
  20. Chakraborty D, Mondal NK, Datta JK. Indoor pollution from solid biomass fuel and rural health damage: A micro-environmental study in rural area of Burdwan, West Bengal. *Int J Sustain built Environ*. 2014;3(2):262-271.
  21. Pinto VS. An analysis of association between using solid fuel and anemia among reproductive age women, 15-49 years old in Timor-Leste. Published online 2016.
  22. Baranwal A, Baranwal A, Roy N. Association of household environment and prevalence of anemia among children under-5 in India. *Front public Heal*. 2014;2:196.
  23. Epstein MB, Bates MN, Arora NK, Balakrishnan K, Jack DW, Smith KR. Household fuels, low birth weight, and neonatal death in India: the separate impacts of biomass, kerosene, and coal. *Int J Hyg Environ Health*. 2013;216(5):523-532.
  24. Ali SA, Khan U, Feroz A. Prevalence and Determinants of Anemia among Women of Reproductive Age in Developing Countries. *J Coll Physicians Surg Pakistan*. 2020;30(2):177-186.
  25. Naz S, Page A, Agho KE. Household air pollution from use of cooking fuel and under-five mortality: The role of breastfeeding status and kitchen location in Pakistan. *PLoS One*. 2017;12(3):e0173256.
  26. Sreeramareddy CT, Shidhaye RR, Sathiakumar N. Association between biomass fuel use and maternal report of child size at birth-an analysis of 2005-06 India Demographic Health Survey data. *BMC Public Health*. 2011;11(1):403.
  27. Yaya S, Uthman OA, Ekholuenetale M, Bishwajit G, Adjiwanou V. Effects of birth spacing on adverse childhood health outcomes: evidence from 34 countries in sub-Saharan Africa. *J Matern & Neonatal Med*. 2020;33(20):3501-3508.
  28. Organization WH, others. Progress on drinking water, sanitation and hygiene: 2017 update and SDG baselines. Published online 2017.
  29. Armah FA, Ekumah B, Yawson DO, Odoi JO, Afitiri A-R, Nyieku FE. Access to improved water and sanitation in sub-Saharan Africa in a quarter century. *Heliyon*. 2018;4(11):e00931.

- 1
  - 2
  - 3
  - 4
  - 5
  - 6
  - 7
  - 8
  - 9
  - 10
  - 11
  - 12
  - 13
  - 14
  - 15
  - 16
  - 17
  - 18
  - 19
  - 20
  - 21
  - 22
  - 23
  - 24
  - 25
  - 26
  - 27
  - 28
  - 29
  - 30
  - 31
  - 32
  - 33
  - 34
  - 35
  - 36
  - 37
  - 38
  - 39
  - 40
  - 41
  - 42
  - 43
  - 44
  - 45
  - 46
  - 47
  - 48
  - 49
  - 50
  - 51
  - 52
  - 53
  - 54
  - 55
  - 56
  - 57
  - 58
  - 59
  - 60
30. Chandran V, Kirby RS. An Analysis of Maternal, Social and Household Factors Associated with Childhood Anemia. *Int J Environ Res Public Health*. 2021;18(6). doi:10.3390/ijerph18063105
31. Armah FA, Ekumah B, Yawson DO, et al. Predictive Probabilities of Access to Clean Cooking : Evidence from the Demographic and Health Surveys in 31 Countries in Sub-Saharan Africa. 2019;12(3):320-322. doi:10.1089/env.2019.0002
32. Zhou N, Cui Z, Yang S, et al. Air pollution and decreased semen quality: a comparative study of Chongqing urban and rural areas. *Environ Pollut*. 2014;187:145-152.
33. Hulin M, Caillaud D, Annesi-Maesano I. Indoor air pollution and childhood asthma: variations between urban and rural areas. *Indoor Air*. 2010;20(6):502-514.
34. UNICEF. *Clear the Air for Children: The Impact of Air Pollution on Children.*; 2016. <https://www.unicef.org/media/60106/file%0A%0A>
35. Pathak U, Gupta NC, Suri JC. Risk of COPD due to indoor air pollution from biomass cooking fuel: a systematic review and meta-analysis. *Int J Environ Health Res*. 2020;30(1):75-88. doi:10.1080/09603123.2019.1575951
36. Amadu I, Seidu A-A, Duku E, et al. The Joint Effect of Maternal Marital Status and Type of Household Cooking Fuel on Child Nutritional Status in Sub-Saharan Africa: Analysis of Cross-Sectional Surveys on Children from 31 Countries. *Nutrients*. 2021;13(5). doi:10.3390/nu13051541
37. Mensah CA. Urban Green Spaces in Africa : Nature and Challenges. 2014;4(1):1-11. doi:10.5923/j.ije.20140401.01
38. Ross CE, Mirowsky J. Neighborhood socioeconomic status and health: context or composition? *City Community*. 2008;7(2):163-179.
39. Weiss G, Goodnough LT. Anemia of chronic disease. *N Engl J Med*. 2005;352(10):1011-1023.
40. Gebreegziabiher G, Etana B, Niggusie D. Determinants of anemia among children aged 6--59 months living in Kilde Awulaelo Woreda, Northern Ethiopia. *Anemia*. 2014;2014.
41. Santos RF dos, Gonzalez ESC, Albuquerque EC de, et al. Prevalence of anemia in under five-year-old children in a children's hospital in Recife, Brazil. *Rev Bras Hematol Hemoter*. 2011;33(2):100-104.
42. Ali D, Saha KK, Nguyen PH, et al. Household food insecurity is associated with higher child undernutrition in Bangladesh, Ethiopia, and Vietnam, but the effect is not mediated by child dietary diversity. *J Nutr*. 2013;143(12):2015-2021.
43. Gebreweld A, Ali N, Ali R, Fisha T. Prevalence of anemia and its associated factors among children under five years of age attending at Guguftu health center, South Wollo, Northeast Ethiopia. *PLoS One*. 2019;14(7):e0218961.

- 1
- 2
- 3
- 4 44. Asresie MB, Fekadu GA, Dagneu GW. Determinants of Anemia among Children Aged
- 5 6--59 Months in Ethiopia: Further Analysis of the 2016 Ethiopian Demographic Health
- 6 Survey. *Adv Public Heal.* 2020;2020.
- 7
- 8 45. Kawo KN, Asfaw ZG, Yohannes N. Multilevel analysis of determinants of anemia
- 9 prevalence among children aged 6--59 Months in Ethiopia: classical and bayesian
- 10 approaches. *Anemia.* 2018;2018.
- 11
- 12 46. Woldie H, Kebede Y, Tariku A. Factors associated with anemia among children aged 6--
- 13 23 months attending growth monitoring at Tsitsika Health Center, Wag-Himra Zone,
- 14 Northeast Ethiopia. *J Nutr Metab.* 2015;2015.
- 15
- 16 47. Muniz PT, Castro TG de, Araújo TS de, et al. Child health and nutrition in the Western
- 17 Brazilian Amazon: population-based surveys in two counties in Acre State. *Cad Saude*
- 18 *Publica.* 2007;23(6):1283-1293.
- 19
- 20 48. Prieto-Patron A, der Horst K, Hutton Z V, Detzel P. Association between anaemia in
- 21 children 6 to 23 months old and child, mother, household and feeding indicators.
- 22 *Nutrients.* 2018;10(9):1269.
- 23
- 24 49. Zhao A, Zhang Y, Peng Y, et al. Prevalence of anemia and its risk factors among
- 25 children 6--36 months old in Burma. *Am J Trop Med Hyg.* 2012;87(2):306-311.
- 26
- 27 50. Pasricha S-R, Black J, Muthayya S, et al. Determinants of Anemia Among Young
- 28 Children in Rural India. *Pediatrics.* 2010;126(1):e140 LP-e149. doi:10.1542/peds.2009-3108
- 29
- 30 51. Agbozo F, Colecraft E, Jahn A, Guetterman T. Understanding why child welfare clinic
- 31 attendance and growth of children in the nutrition surveillance programme is below
- 32 target: lessons learnt from a mixed methods study in Ghana. *BMC Nurs.* 2018;17(1):25.
- 33
- 34 52. Abdi Guled R, Mamat NM, Balachew T, Bakar MA, Azdie W, Assefa N. Predictors and
- 35 prevalence of anemia, among children aged 6 to 59 months in shebelle zone, Somali
- 36 region, eastern Ethiopia: a cross sectional study. *Int J Dev Res.* 2017;7(1):11189-11196.
- 37
- 38 53. Khan JR, Awan N, Misu F. Determinants of anemia among 6--59 months aged children
- 39 in Bangladesh: evidence from nationally representative data. *BMC Pediatr.* 2016;16(1):3.
- 40
- 41 54. Parbey PA, Kyei-Duodu G, Takramah W, et al. Prevalence of anaemia and associated
- 42 risk factors among children under five years in hohoe municipality, Ghana. *J Sci Res*
- 43 *Reports.* Published online 2017:1-12.
- 44
- 45 55. Kuziga F, Adoke Y, Wanyenze RK. Prevalence and factors associated with anaemia
- 46 among children aged 6 to 59 months in Namutumba district, Uganda: a cross-sectional
- 47 study. *BMC Pediatr.* 2017;17(1):25.
- 48
- 49 56. de Pee S, Bloem MW, Sari M, Kiess L, Yip R, Kosen S. The High Prevalence of Low
- 50 Hemoglobin Concentration among Indonesian Infants Aged 3--5 Months Is Related to
- 51 Maternal Anemia. *J Nutr.* 2002;132(8):2215-2221. doi:10.1093/jn/132.8.2215
- 52
- 53 57. Engidaye G, Melku M, Yalew A, Getaneh Z, Asrie F, Enawgaw B. Under nutrition,
- 54
- 55
- 56
- 57
- 58
- 59
- 60

- 1  
2  
3 maternal anemia and household food insecurity are risk factors of anemia among  
4 preschool aged children in Menz Gera Midir district, Eastern Amhara, Ethiopia: a  
5 community based cross-sectional study. *BMC Public Health*. 2019;19(1):968.  
6  
7  
8 58. Khan JR, Awan N. A comprehensive analysis on child mortality and its determinants in  
9 Bangladesh using frailty models. *Arch Public Heal*. 2017;75(1):1-10.  
10  
11 59. Ngnie-Teta I, Receveur O, Kuate-Defo B. Risk factors for moderate to severe anemia  
12 among children in Benin and Mali: insights from a multilevel analysis. *Food Nutr Bull*.  
13 2007;28(1):76-89.  
14  
15 60. Kothari MT, Coile A, Huestis A, Pullum T, Garrett D, Engmann C. Exploring associations  
16 between water, sanitation, and anemia through 47 nationally representative  
17 demographic and health surveys. *Ann N Y Acad Sci*. 2019;1450(1):249.  
18  
19 61. Magadi M, Desta M. A multilevel analysis of the determinants and cross-national  
20 variations of HIV seropositivity in sub-Saharan Africa: Evidence from the DHS. *Health*  
21 *Place*. 2011;17(5):1067-1083. doi:<https://doi.org/10.1016/j.healthplace.2011.06.004>  
22  
23  
24  
25  
26  
27  
28  
29  
30  
31  
32  
33  
34

## 35 Tables

36  
37 **Table 1:** Classification of the source of drinking water and toilet facilities under the  
38 WHO/UNICEF Joint Monitoring Programme and cooking fuel.  
39  
40

| 41 Service                   | 42 Improved/Clean                                                                                                                                          | 43 Unimproved/Unclean                                                                                   |
|------------------------------|------------------------------------------------------------------------------------------------------------------------------------------------------------|---------------------------------------------------------------------------------------------------------|
| 44 Drinking water sources    | 45 Piped water, boreholes or tube wells, protected dug wells, protected springs, rainwater, and packaged or delivered water.                               | 46 Unprotected dug well, unprotected spring, river, dam, lake, pond, stream, canal and irrigation canal |
| 47 Type of toilet facilities | 48 Flush/pour flush to piped sewer systems, septic tanks or pit latrines, ventilated improved pit latrines, composting toilets or pit latrines with slabs. | 49 Pit latrines without a slab or platform, hanging latrines or bucket latrines and open defecation.    |

1  
2  
3 Cooking fuel Electricity, liquid petroleum gas Kerosene, coal/lignite, charcoal,  
4 type (LPG), natural gas and biogas wood, straw/shrubs/grass and animal  
5 dung  
6  
7  
8  
9  
10  
11  
12  
13  
14  
15  
16  
17  
18  
19  
20  
21  
22  
23  
24  
25  
26  
27  
28  
29  
30  
31  
32  
33  
34  
35  
36  
37  
38  
39  
40  
41  
42  
43  
44  
45  
46  
47  
48  
49  
50  
51  
52  
53  
54  
55  
56  
57  
58  
59  
60

---

For peer review only



**Table 2:** Distribution of child anaemia status by predictor variables.

| Variable                                            | Weighted n | Weighted % | Anemia status |            | Variable                                  | Weighted n | Weighted % | Anemia status |            |
|-----------------------------------------------------|------------|------------|---------------|------------|-------------------------------------------|------------|------------|---------------|------------|
|                                                     |            |            | Normal (%)    | Anemic (%) |                                           |            |            | Normal (%)    | Anemic (%) |
| <b>Key predictor</b>                                |            |            |               |            |                                           |            |            |               |            |
| <b>Urbanicity-Type of cooking fuel (p&lt;0.001)</b> |            |            |               |            | <b>Employment status (p&lt;0.001)</b>     |            |            |               |            |
| Urban-Unclean                                       | 27,280     | 22         | 38            | 62         | No                                        | 44,403     | 36         | 34            | 66         |
| Urban-Clean                                         | 10,480     | 9          | 43            | 57         | Yes                                       | 77,975     | 64         | 36            | 64         |
| Rural-Unclean                                       | 83,261     | 68         | 34            | 66         | <b>ANC (p&lt;0.001)</b>                   |            |            |               |            |
| Rural-Clean                                         | 1,388      | 1          | 42            | 58         | No                                        | 7,823      | 10         | 26            | 74         |
| <b>Individual-level characteristics</b>             |            |            |               |            | Yes                                       | 74,542     | 91         | 34            | 66         |
| <b>Child age (p&lt;0.001)</b>                       |            |            |               |            | <b>PNC (p= 0.534)</b>                     |            |            |               |            |
| 0                                                   | 14,807     | 12         | 21            | 79         | No                                        | 43,739     | 56         | 32            | 68         |
| 1                                                   | 28,811     | 24         | 25            | 75         | Yes                                       | 34,884     | 44         | 32            | 68         |
| 2                                                   | 26,779     | 22         | 36            | 64         | <b>Household-level characteristics</b>    |            |            |               |            |
| 3                                                   | 26,716     | 22         | 43            | 57         | <b>Wealth (p&lt;0.001)</b>                |            |            |               |            |
| 4                                                   | 25,304     | 21         | 49            | 51         | Poor                                      | 54,683     | 45         | 31            | 69         |
| <b>Sex of child (p&lt;0.001)</b>                    |            |            |               |            | Middle                                    | 24,810     | 20         | 35            | 65         |
| Male                                                | 61,873     | 51         | 34            | 66         | Rich                                      | 42,922     | 35         | 41            | 59         |
| Female                                              | 60,543     | 49         | 37            | 63         | <b>Household size (p&lt;0.001)</b>        |            |            |               |            |
| <b>Birth order (p&lt;0.001)</b>                     |            |            |               |            | Small                                     | 49,586     | 41         | 38            | 62         |
| 1                                                   | 25,382     | 21         | 37            | 63         | Medium                                    | 56,844     | 46         | 35            | 65         |
| 2                                                   | 59,156     | 48         | 36            | 64         | Large                                     | 15,986     | 13         | 28            | 72         |
| 3 and above                                         | 37,878     | 31         | 33            | 67         | <b>Age of household head (p&lt;0.001)</b> |            |            |               |            |
| <b>Perceived birth size (p&lt;0.001)</b>            |            |            |               |            | Young-aged adults                         | 52,244     | 43         | 36            | 64         |
| Larger than average                                 | 40,251     | 34         | 36            | 64         | Middle-aged adults                        | 54,249     | 44         | 35            | 65         |

|                                    |        |    |    |    |                                              |         |    |    |    |
|------------------------------------|--------|----|----|----|----------------------------------------------|---------|----|----|----|
| Average                            | 58,862 | 50 | 36 | 64 | Old-aged adults                              | 15,921  | 13 | 33 | 67 |
| smaller than average               | 17,668 | 15 | 34 | 66 | <b>Sex of household head (p&lt;0.001)</b>    |         |    |    |    |
| Don't know                         | 1,675  | 1  | 29 | 71 | Male                                         | 98,700  | 81 | 35 | 65 |
| <b>Age of mother (p&lt;0.001)</b>  |        |    |    |    | Female                                       | 23,716  | 19 | 38 | 62 |
| 15-19                              | 5,903  | 5  | 25 | 75 | <b>Access to electricity (p&lt;0.000)</b>    |         |    |    |    |
| 20-24                              | 25,845 | 21 | 32 | 68 | No                                           | 85,532  | 70 | 34 | 66 |
| 25-29                              | 33,385 | 27 | 36 | 64 | Yes                                          | 36,875  | 30 | 40 | 60 |
| 30-34                              | 26,993 | 22 | 37 | 63 | <b>Type of toilet facility (p&lt;0.001)</b>  |         |    |    |    |
| 35-39                              | 18,763 | 15 | 38 | 62 | Improved                                     | 54,271  | 44 | 40 | 60 |
| 40-44                              | 8,814  | 7  | 39 | 61 | Unimproved                                   | 68,135  | 56 | 32 | 68 |
| 45-49                              | 2,714  | 2  | 38 | 62 | <b>Source of drinking water (p&lt;0.001)</b> |         |    |    |    |
| <b>BMI of mother (p&lt;0.001)</b>  |        |    |    |    | Improved                                     | 79,965  | 65 | 36 | 64 |
| Thin                               | 10,392 | 10 | 30 | 70 | Unimproved                                   | 42,441  | 35 | 34 | 66 |
| Normal                             | 70,647 | 67 | 34 | 66 | <b>Contextual factor</b>                     |         |    |    |    |
| Obese                              | 24,433 | 23 | 43 | 57 | <b>Geographic region(p&lt;0.001)</b>         |         |    |    |    |
| <b>Education (p&lt;0.001)</b>      |        |    |    |    | Western Africa                               | 49,028  | 40 | 25 | 75 |
| No formal                          | 48,650 | 40 | 28 | 72 | Eastern Africa                               | 48,674  | 40 | 44 | 56 |
| Primary                            | 41,673 | 34 | 40 | 60 | Central Africa                               | 21,729  | 18 | 37 | 63 |
| Secondary                          | 28,670 | 23 | 42 | 58 | Southern Africa                              | 2,986   | 2  | 46 | 54 |
| Tertiary                           | 3,423  | 3  | 52 | 48 | N                                            | 123,182 |    |    |    |
| <b>Marital status (p&lt;0.001)</b> |        |    |    |    | <b>Anaemia status</b>                        |         |    |    |    |
| Never married                      | 6,468  | 5  | 36 | 64 | Normal                                       | 44,403  | 36 |    |    |
| Married                            | 87,591 | 72 | 35 | 65 | Anaemic                                      | 77,975  | 64 |    |    |
| Living with a partner              | 20,322 | 17 | 38 | 62 |                                              |         |    |    |    |
| Widowed/divorced/separated         | 8,036  | 7  | 39 | 61 |                                              |         |    |    |    |



1  
2  
3  
4  
5  
6  
7  
8  
9  
10  
11  
12  
13  
14  
15  
16  
17  
18  
19  
20  
21  
22  
23  
24  
25  
26  
27  
28  
29  
30  
31  
32  
33  
34  
35  
36  
37  
38  
39  
40  
41  
42  
43  
44  
45  
46  
47

**Table 3.** Multilevel logistic regression results on the joint effect of urbanicity and type of household cooking fuel on childhood anaemia

| Variables                              | Model o |          | Model I  |        |       | Model II |        |       | Model III |        |       | Model IV |             |
|----------------------------------------|---------|----------|----------|--------|-------|----------|--------|-------|-----------|--------|-------|----------|-------------|
|                                        | OR      | (95% CI) | aOR      | 95% CI |       | aOR      | 95% CI |       | aOR       | 95% CI |       | aOR      | 95% CI      |
| <b>Fixed effects</b>                   |         |          |          |        |       |          |        |       |           |        |       |          |             |
| <b>Urbanicity-Type of cooking fuel</b> |         |          |          |        |       |          |        |       |           |        |       |          |             |
| Urban-Clean                            |         |          | 1        |        |       | 1        |        |       | 1         |        |       | 1        |             |
| Urban-Unclean                          |         |          | 1.350*** | 1.286  | 1.418 | 1.229*** | 1.145  | 1.320 | 1.206***  | 1.122  | 1.297 | 1.063    | 0.987 1.146 |
| Rural-Unclean                          |         |          | 1.673*** | 1.600  | 1.750 | 1.211*** | 1.129  | 1.299 | 1.115**   | 1.032  | 1.205 | 1.120**  | 1.033 1.214 |
| Rural-Clean                            |         |          | 1.273*** | 1.144  | 1.416 | 1.317*** | 1.136  | 1.526 | 1.239**   | 1.067  | 1.438 | 1.256**  | 1.080 1.460 |
| <b>Child age</b>                       |         |          |          |        |       |          |        |       |           |        |       |          |             |
| 0                                      |         |          |          |        |       | 1        |        |       |           |        |       |          |             |
| 1                                      |         |          |          |        |       | 0.803*** | 0.762  | 0.847 | 0.804**   | 0.762  | 0.847 | 0.799*** | 0.758 0.844 |
| 2                                      |         |          |          |        |       | 0.498**  | 0.471  | 0.362 | 0.500***  | 0.473  | 0.528 | 0.493*** | 0.466 0.521 |
| 3                                      |         |          |          |        |       | 0.341*** | 0.321  | 0.362 | 0.345***  | 0.325  | 0.367 | 0.342*** | 0.322 0.364 |
| 4                                      |         |          |          |        |       | 0.261*** | 0.244  | 0.279 | 0.265***  | 0.247  | 0.284 | 0.264*** | 0.247 0.283 |
| <b>Sex of child</b>                    |         |          |          |        |       |          |        |       |           |        |       |          |             |
| Male                                   |         |          |          |        |       | 1        |        |       | 1         |        |       | 1        |             |
| Female                                 |         |          |          |        |       | 0.862*** | 0.834  | 0.891 | 0.861***  | 0.833  | 0.890 | 0.857*** | 0.829 0.887 |
| <b>Birth order</b>                     |         |          |          |        |       |          |        |       |           |        |       |          |             |
| 1                                      |         |          |          |        |       | 1        |        |       | 1         |        |       | 1        |             |
| 2                                      |         |          |          |        |       | 1.152*** | 1.092  | 1.216 | 1.124***  | 1.065  | 1.186 | 1.121*** | 1.061 1.184 |
| 3 and above                            |         |          |          |        |       | 1.397*** | 1.302  | 1.498 | 1.258***  | 1.170  | 1.353 | 1.269*** | 1.179 1.367 |
| <b>Perceived birth size</b>            |         |          |          |        |       |          |        |       |           |        |       |          |             |
| Larger than average                    |         |          |          |        |       | 1        |        |       | 1         |        |       | 1        |             |
| Average                                |         |          |          |        |       | 1.004    | 0.968  | 1.041 | 1.015     | 0.978  | 1.053 | 1.052**  | 1.014 1.093 |

|                            |  |  |  |  |  |          |       |       |          |       |       |          |       |       |
|----------------------------|--|--|--|--|--|----------|-------|-------|----------|-------|-------|----------|-------|-------|
| smaller than average       |  |  |  |  |  | 1.026    | 0.975 | 1.08  | 1.026    | 0.975 | 1.080 | 1.075**  | 1.020 | 1.132 |
| Don't know                 |  |  |  |  |  | 1.184*   | 1.009 | 1.39  | 1.178*   | 1.003 | 1.384 | 1.129    | 0.960 | 1.328 |
| <b>Age of mother</b>       |  |  |  |  |  |          |       |       |          |       |       |          |       |       |
| 15-19                      |  |  |  |  |  | 1        |       |       | 1        |       |       | 1        |       |       |
| 20-24                      |  |  |  |  |  | 0.802*** | 0.735 | 0.875 | 0.834*** | 0.763 | 0.910 | 0.869**  | 0.795 | 0.950 |
| 25-29                      |  |  |  |  |  | 0.658*** | 0.600 | 0.722 | 0.689**  | 0.628 | 0.756 | 0.733*** | 0.667 | 0.806 |
| 30-34                      |  |  |  |  |  | 0.586*** | 0.532 | 0.647 | 0.608**  | 0.550 | 0.671 | 0.667*** | 0.603 | 0.737 |
| 35-39                      |  |  |  |  |  | 0.538*** | 0.484 | 0.597 | 0.543*** | 0.488 | 0.604 | 0.602*** | 0.540 | 0.671 |
| 40-44                      |  |  |  |  |  | 0.526*** | 0.469 | 0.59  | 0.526*** | 0.468 | 0.592 | 0.599*** | 0.532 | 0.675 |
| 45-49                      |  |  |  |  |  | 0.497*** | 0.433 | 0.572 | 0.493*** | 0.428 | 0.568 | 0.559*** | 0.484 | 0.645 |
| <b>BMI of mother</b>       |  |  |  |  |  |          |       |       |          |       |       |          |       |       |
| Thin                       |  |  |  |  |  | 1        |       |       | 1        |       |       | 1        |       |       |
| Normal                     |  |  |  |  |  | 0.955    | 0.901 | 1.012 | 0.970*** | 0.915 | 1.028 | 0.923**  | 0.870 | 0.979 |
| Obese                      |  |  |  |  |  | 0.816*** | 0.765 | 0.871 | 0.841*** | 0.787 | 0.898 | 0.780*** | 0.730 | 0.834 |
| <b>Education</b>           |  |  |  |  |  |          |       |       |          |       |       |          |       |       |
| No formal                  |  |  |  |  |  | 1        |       |       | 1        |       |       | 1        |       |       |
| Primary                    |  |  |  |  |  | 0.531*** | 0.509 | 0.554 | 0.56803  | 0.545 | 0.592 | 0.779*** | 0.745 | 0.815 |
| Secondary                  |  |  |  |  |  | 0.502*** | 0.479 | 0.527 | 0.54016  | 0.514 | 0.567 | 0.676*** | 0.642 | 0.713 |
| Tertiary                   |  |  |  |  |  | 0.392*** | 0.354 | 0.435 | 0.43671  | 0.393 | 0.485 | 0.534*** | 0.480 | 0.595 |
| <b>Marital status</b>      |  |  |  |  |  |          |       |       |          |       |       |          |       |       |
| Never married              |  |  |  |  |  | 1        |       |       |          |       |       |          |       |       |
| Married                    |  |  |  |  |  | 1.071    | 0.996 | 1.152 | 1.161*** | 1.074 | 1.255 | 1.030    | 0.951 | 1.116 |
| Living with a partner      |  |  |  |  |  | 0.975    | 0.900 | 1.057 | 1.044    | 0.958 | 1.137 | 1.036    | 0.949 | 1.131 |
| Widowed/divorced/separated |  |  |  |  |  | 0.979    | 0.893 | 1.072 | 1.062    | 0.968 | 1.165 | 1.102*   | 1.003 | 1.211 |
| <b>Employment status</b>   |  |  |  |  |  |          |       |       |          |       |       |          |       |       |
| No                         |  |  |  |  |  | 1        |       |       |          |       |       |          |       |       |
| Yes                        |  |  |  |  |  | 0.968    | 0.934 | 1.004 | 0.982    | 0.947 | 1.018 | 0.911*** | 0.878 | 0.946 |

1  
2  
3  
4  
5  
6  
7  
8  
9  
10  
11  
12  
13  
14  
15  
16  
17  
18  
19  
20  
21  
22  
23  
24  
25  
26  
27  
28  
29  
30  
31  
32  
33  
34  
35  
36  
37  
38  
39  
40  
41  
42  
43  
44  
45  
46  
47

|                                 |  |  |  |  |  |         |       |       |          |       |       |              |       |       |
|---------------------------------|--|--|--|--|--|---------|-------|-------|----------|-------|-------|--------------|-------|-------|
| <b>Antenatal care</b>           |  |  |  |  |  |         |       |       |          |       |       |              |       |       |
| No                              |  |  |  |  |  | 1       |       |       |          |       |       |              |       |       |
| Yes                             |  |  |  |  |  | 0.912** | 0.857 | 0.969 | 0.940*   | 0.884 | 1.000 | 0.931*       | 0.874 | 0.991 |
| <b>Wealth</b>                   |  |  |  |  |  |         |       |       |          |       |       |              |       |       |
| Poor                            |  |  |  |  |  |         |       |       | 1        |       |       |              |       |       |
| Middle                          |  |  |  |  |  |         |       |       | 0.928**  | 0.885 | 0.973 | 0.917***     | 0.874 | 0.962 |
| Rich                            |  |  |  |  |  |         |       |       | 0.830*** | 0.790 | 0.873 | 0.888**<br>* | 0.844 | 0.935 |
| <b>Household size</b>           |  |  |  |  |  |         |       |       |          |       |       |              |       |       |
| Small                           |  |  |  |  |  |         |       |       | 1        |       |       | 1            |       |       |
| Medium                          |  |  |  |  |  |         |       |       | 1.109*** | 1.066 | 1.156 | 1.095***     | 1.051 | 1.142 |
| Large                           |  |  |  |  |  |         |       |       | 1.472*** | 1.383 | 1.566 | 1.240***     | 1.163 | 1.321 |
| <b>Age of household head</b>    |  |  |  |  |  |         |       |       |          |       |       |              |       |       |
| Young-aged adults               |  |  |  |  |  |         |       |       | 1        |       |       |              |       |       |
| Middle-aged adults              |  |  |  |  |  |         |       |       | 1.087*** | 1.041 | 1.136 | 1.012        | 0.968 | 1.058 |
| Old-aged adults                 |  |  |  |  |  |         |       |       | 1.088**  | 1.026 | 1.153 | 0.966        | 0.910 | 1.025 |
| <b>Sex of household head</b>    |  |  |  |  |  |         |       |       |          |       |       |              |       |       |
| Male                            |  |  |  |  |  |         |       |       | 1        |       |       |              |       |       |
| Female                          |  |  |  |  |  |         |       |       | 0.945**  | 0.903 | 0.989 | 0.966        | 0.923 | 1.011 |
| <b>Access to electricity</b>    |  |  |  |  |  |         |       |       |          |       |       |              |       |       |
| No                              |  |  |  |  |  |         |       |       | 1        |       |       |              |       |       |
| Yes                             |  |  |  |  |  |         |       |       | 1.090*** | 1.039 | 1.143 | 0.896**<br>* | 0.853 | 0.941 |
| <b>Type of toilet facility</b>  |  |  |  |  |  |         |       |       |          |       |       |              |       |       |
| Unimproved                      |  |  |  |  |  |         |       |       | 1        |       |       |              |       |       |
| Improved                        |  |  |  |  |  |         |       |       | 0.856*** | 0.824 | 0.889 | 0.927***     | 0.892 | 0.963 |
| <b>Source of drinking water</b> |  |  |  |  |  |         |       |       |          |       |       |              |       |       |
| Unimproved                      |  |  |  |  |  |         |       |       | 1        |       |       |              |       |       |
| Improved                        |  |  |  |  |  |         |       |       | 1.046**  | 1.008 | 1.085 | 1.046**      | 1.008 | 1.086 |
| <b>Geographic region</b>        |  |  |  |  |  |         |       |       |          |       |       |              |       |       |

|                       |                 |  |                 |  |  |                 |  |  |                 |  |  |                 |       |       |
|-----------------------|-----------------|--|-----------------|--|--|-----------------|--|--|-----------------|--|--|-----------------|-------|-------|
| Western Africa        |                 |  |                 |  |  |                 |  |  |                 |  |  | 1               |       |       |
| Eastern Africa        |                 |  |                 |  |  |                 |  |  |                 |  |  | 0.397***        | 0.380 | 0.415 |
| Central Africa        |                 |  |                 |  |  |                 |  |  |                 |  |  | 0.562***        | 0.532 | 0.595 |
| Southern Africa       |                 |  |                 |  |  |                 |  |  |                 |  |  | 0.497***        | 0.451 | 0.548 |
| <b>Random effects</b> |                 |  |                 |  |  |                 |  |  |                 |  |  |                 |       |       |
| PSU Variance (95% CI) | 0.02(0.02-0.03) |  | 0.01(0.02-0.03) |  |  | 0.02(0.01-0.03) |  |  | 0.02(0.01-0.03) |  |  | 0.02(0.01-0.03) |       |       |
| ICC                   | 0.007           |  | 0.007           |  |  | 0.006           |  |  | 0.005           |  |  | 0.005           |       |       |
| LR Test               | 157.11***       |  | 162.27***       |  |  | 33.77***        |  |  | 32.09***        |  |  | 31.14***        |       |       |
| Wild $\chi^2$         | Reference       |  | 638.08***       |  |  | 5397.49***      |  |  | 5699.37***      |  |  | 7017.31***      |       |       |
| <b>Model fitness</b>  |                 |  |                 |  |  |                 |  |  |                 |  |  |                 |       |       |
| Log-likelihood        | -7995.2         |  | -79633.85       |  |  | -41560.3        |  |  | -41341.3        |  |  | -40448.4        |       |       |
| AIC                   | 2E+05           |  | 159277.7        |  |  | 83182.53        |  |  | 82764.6         |  |  | 80984.8         |       |       |
| Number of clusters    | 1,382           |  | 1,382           |  |  | 1,382           |  |  | 1,382           |  |  | 1,382           |       |       |

1=Ref, AOR=Adjusted Odds Ratio; CI=Confidence Interval

\*p<0.05 \*\*p<0.01 \*\*\*p<0.001

## Figure Legends

Figure 1: Map of study countries

Figure 2: Map of study countries showing the distribution of child under age five years anaemia status

1  
2  
3  
4  
5  
6  
7  
8  
9  
10  
11  
12  
13  
14  
15  
16  
17  
18  
19  
20  
21  
22  
23  
24  
25  
26  
27  
28  
29  
30  
31  
32  
33  
34  
35  
36  
37  
38  
39  
40  
41  
42  
43  
44  
45  
46  
47  
48  
49  
50  
51  
52  
53  
54  
55  
56  
57  
58  
59  
60

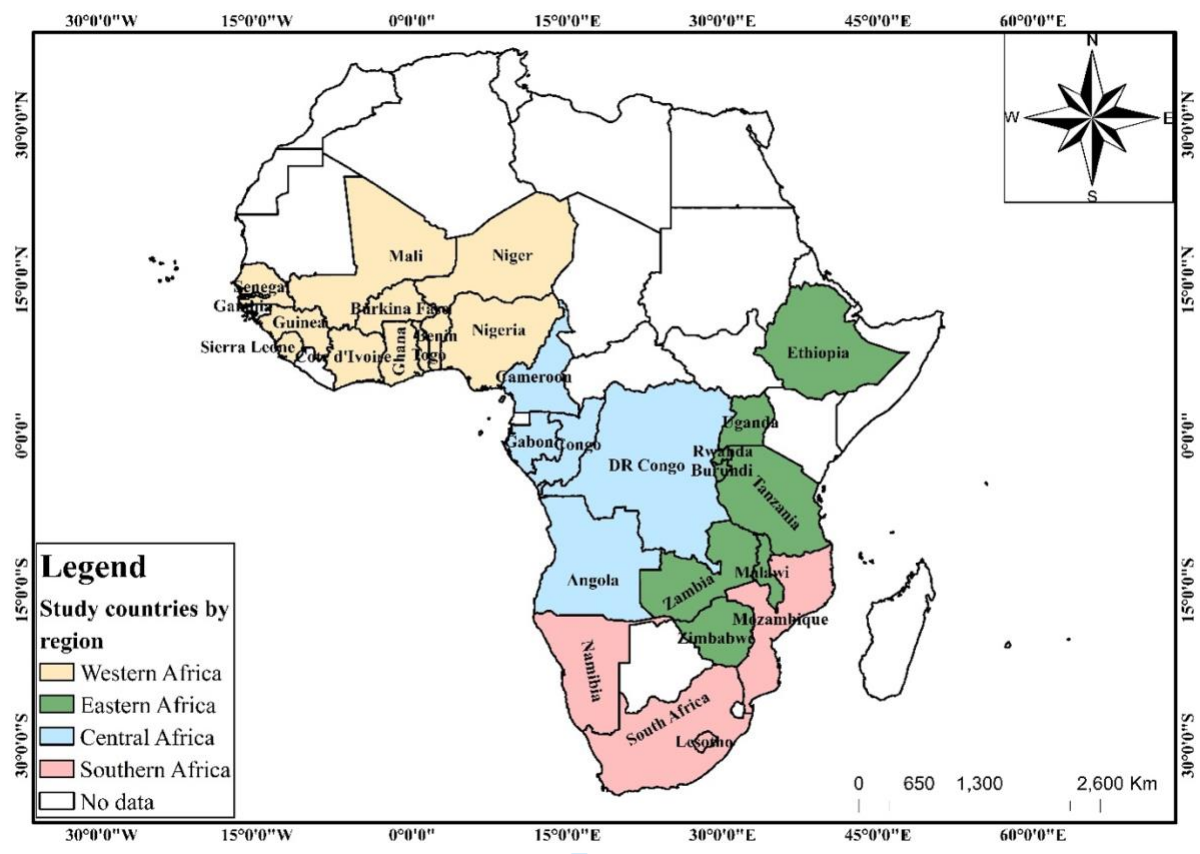

Figure 1: Map of study countries

review only

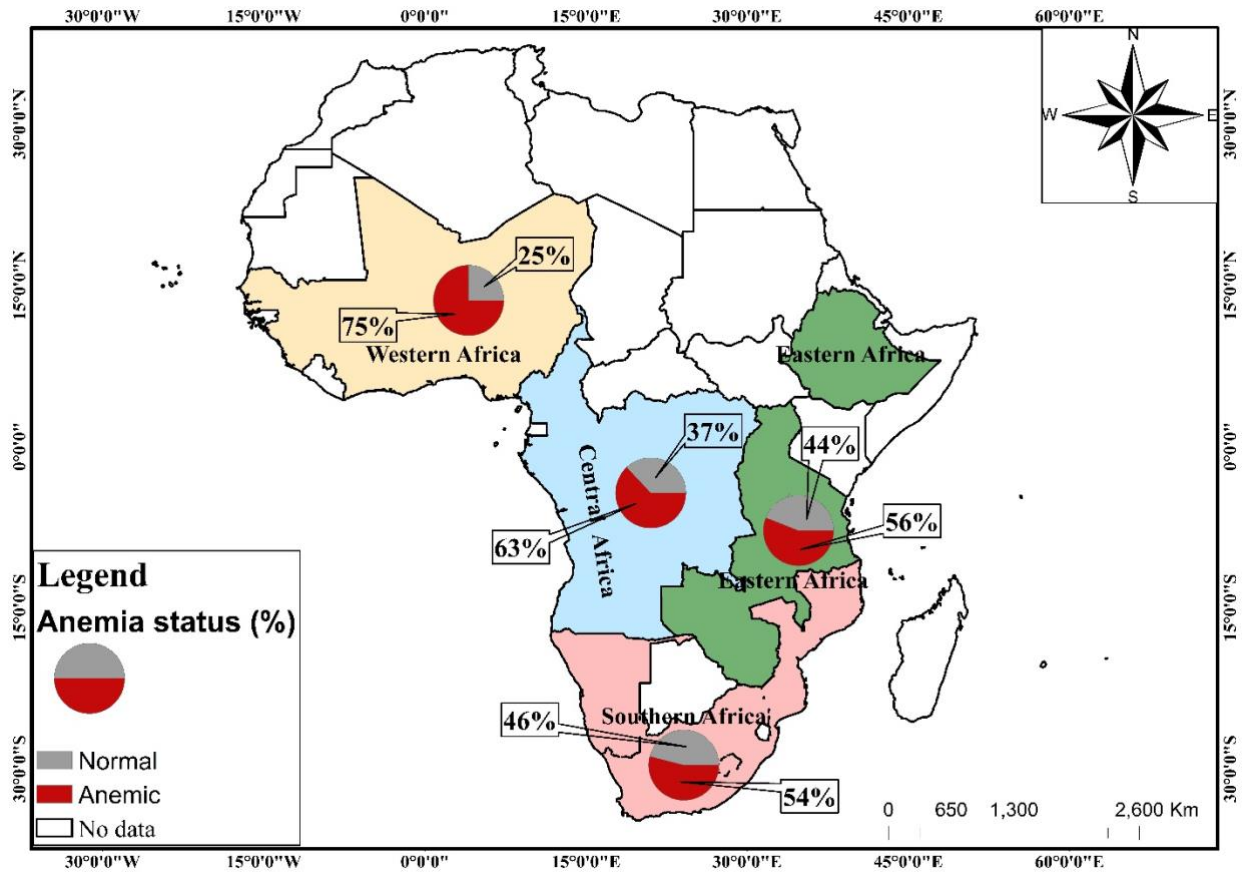

Figure 2: Map of study countries showing the distribution of child under age five years anaemia status
